# Supplementary material for: Efficient SF6 capture and separation in robust gallium- and vanadium-based metal–organic frameworks
Source: Royal Society of Chemistry journal article supplement (doi:10.1039/d3ta05297d), 2023-01-01
Supplement: d3ta05297d1.pdf [file d3ta05297d1.pdf]

## Supporting information

### Efficient SF<sub>6</sub> capture and separation in robust gallium- and vanadium metal-organic frameworks

Michelle Åhlén,<sup>a</sup> Yi Zhou,<sup>\*b,c</sup> Daniel Hedbom,<sup>a</sup> Hae Sung Cho,<sup>b,c,d</sup> Maria Strømme,<sup>a</sup> Osamu Terasaki,<sup>b,c</sup> Ocean Cheung<sup>\*a</sup>

<sup>a</sup>Division of Nanotechnology and Functional Materials, Department of Materials Science and Engineering, Uppsala University, Ångström Laboratory, Uppsala SE-751 03, Box 35, Sweden.

<sup>b</sup>Centre for High-resolution Electron Microscopy (C<sub>h</sub>EM), School of Physical Science and Technology, ShanghaiTech University, Shanghai, 201210, People's Republic of China.

<sup>c</sup>Shanghai Key Laboratory of High-resolution Electron Microscopy, ShanghaiTech University, Shanghai, 201210, People's Republic of China

<sup>d</sup>Department of Chemistry, Chung-Ang University, 06974 Seoul, Republic of Korea

Corresponding authors: [yizhou@whu.edu.cn](mailto:yizhou@whu.edu.cn); [ocean.cheung@angstrom.uu.se](mailto:ocean.cheung@angstrom.uu.se)

### Table of contents

|                                                                                                 |    |
|-------------------------------------------------------------------------------------------------|----|
| <b>Section S1. Materials and methods</b> .....                                                  | 1  |
| <b>Section S2. Structure determination</b> .....                                                | 2  |
| <b>Section S3. X-ray photoelectron spectroscopy</b> .....                                       | 16 |
| <b>Section S4. Stability study</b> .....                                                        | 17 |
| <b>Section S5. Scanning electron microscopy images</b> .....                                    | 19 |
| <b>Section S6. Porosity and gas sorption</b> .....                                              | 20 |
| <b>Section S6.2. Gas selectivity</b> .....                                                      | 30 |
| <b>Section S6.2.1. Ideal (Henry's Law) selectivity</b> .....                                    | 30 |
| <b>Section S6.2.2. Ideal adsorption solution theory (IAST) selectivity</b> .....                | 32 |
| <b>Section S7. SF<sub>6</sub> and CO<sub>2</sub> temperature-swing adsorption cycling</b> ..... | 34 |
| <b>References</b> .....                                                                         | 35 |

## Section S1. Materials and methods

### Materials

*N,N*-dimethylformamide (DMF), and Acetic acid  $\geq 99\%$  were purchased from VWR International AB, Sweden. Vanadyl(IV) sulfate hydrate ( $\text{VOSO}_4 \cdot x\text{H}_2\text{O}$ ), Gallium(III) nitrate hydrate ( $\text{Ga}(\text{NO}_3)_3 \cdot x\text{H}_2\text{O}$ ), 1,3,6,8-tetrakis(4-carboxyphenyl)pyrene ( $\text{H}_4\text{TBAPy}$ ), and 1,2,4,5-tetrakis(4-carboxyphenyl)benzene ( $\text{H}_4\text{TCPB}$ ) were purchased from Sigma-Aldrich, USA. All chemicals were used as received without further purification.

### Preparation of V-TBAPy and -TCPB

In a typical procedure,  $\text{VOSO}_4 \cdot x\text{H}_2\text{O}$  (0.20 mmol) and  $\text{H}_4\text{TBAPy}$  (0.20 mmol) were dispersed in 10 ml DMF. The yellow dispersion was thereafter transferred to a 25 ml Teflon—lined stainless steel autoclave and heated at 180 °C for 72 h. The obtained green product was collected by centrifugation at 3,800 rpm for 20 min, washed once with deionized water and twice with DMF, and finally dried overnight in a ventilated oven at 70 °C. V-TCPB was synthesized in the same manner using  $\text{H}_4\text{TCPB}$  (0.20 mmol) as the organic linker instead.

### Preparation of Ga-TBAPy and -TCPB

Ga-TBAPy was prepared from a solvothermal synthesis of  $\text{Ga}(\text{NO}_3)_3 \cdot x\text{H}_2\text{O}$  (0.167 mmol) and  $\text{H}_4\text{TBAPy}$  (0.167 mmol) in a mixture of 11.5 mL DMF and 1.0 mL acetic acid at 120 °C for 48 h in a Teflon-lined stainless steel autoclave. The product was collected by centrifugation at 3,800 rpm for 20 min, washed with DMF three times, and finally dried overnight in a ventilated oven at 70 °C. Similarly, Ga-TCPB was synthesized according to the same procedure using  $\text{H}_4\text{TCPB}$  as the linker.

### Characterization

Powder X-ray diffraction (PXRD) diffractograms were recorded on a Bruker D8 Advanced Powder diffractometer (Bruker, Bremen, Germany) operated at 40 kV and 40 mA, using Cu K $\alpha$  radiation ( $\lambda = 1.5418 \text{ \AA}$ ), a step-size of 0.02 ° and a time-per-step of 0.5 s. Scanning electron microscopy (SEM) images were obtained on a Zeiss Merlin Field Emission Scanning Electron Microscope (Oberkochen, Germany) using an acceleration voltage of 2.5 kV and a probe current of 80 pA. All samples were sputter-coated with a thin layer of Pd/Au prior to imaging.

## Section S2. Structure determination

The structures of the Ga- and V-based MOFs were determined using 3-dimensional electron diffraction (3D ED) combined with high-resolution transmission electron microscopy (HRTEM) imaging, as well as structure modeling. The samples were dispersed in absolute ethanol and a droplet of the suspensions was transferred onto carbon-coated copper grids. The 3D ED data sets were collected on a JEOL JEM-F200 TEM (Tokyo, Japan) operated at an accelerating voltage of 200 kV using an ASI Cheetah 1800 detector under continuous tilting mode. The data was analyzed and visualized using the software *EDT PROCESS*<sup>1</sup> for the determination of unit-cell parameters and reflection conditions and processed by the X-ray Detector Software *XDS*<sup>2</sup> for extraction of reflection intensities which were subsequently used for structure solution. Using *Olex2*<sup>3</sup>, the structure was solved with the integrated space-group and crystal-structure determination program *SHELXT*<sup>4</sup> using Intrinsic Phasing and refined with the *SHELXL*<sup>5</sup> refinement package using Least Squares minimization. Selected area electron diffraction (SAED) and HRTEM images were obtained on a JEOL JEM-2100Plus TEM (Tokyo, Japan) using a TVIPS XF416 detector.

*Le Bail* and Rietveld refinements<sup>6, 7</sup> of the MOFs were performed using the crystallographic program *JANA*<sup>8</sup> over the full sampled angular range based on space group *P2/m* for V- and Ga-TBAPy, Ga-TCPB, and *Pcma* for V-TCPB. The Bragg peaks were modeled by a Pseudo-Voigt peak-shape function modified for asymmetry, with six coefficients that could be refined. The background was treated using a Legendre polynomial with six parameters that could be refined for the samples. The starting atomic coordinates were adopted from the model obtained by 3D ED data. Because of the complexity of the structural model, constraints on V-O, Ga-O, C-O, and C-C distances were applied, and their weight was removed in the final cycles. All materials were visualized by using the 3D visualization program *VESTA*<sup>9</sup>.

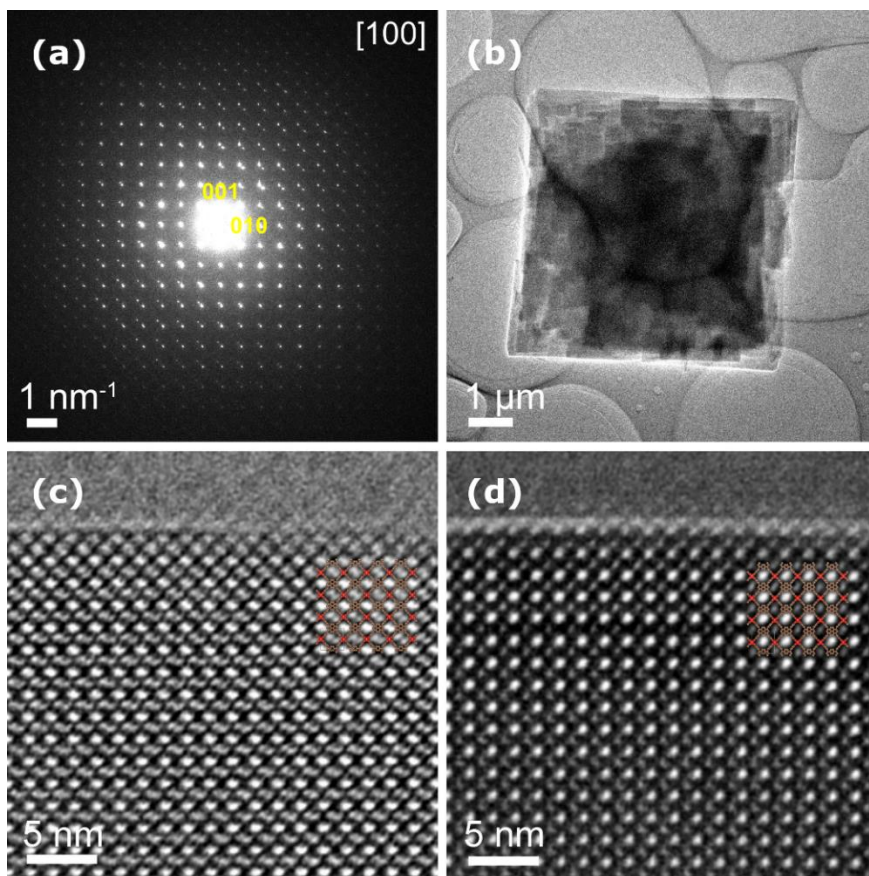

**Fig. S1.** (a) Selected area electron diffraction pattern, (b) low magnification bright-field image, and (c – d) corresponding high-resolution TEM images of V-TBAPy with an insert of the structure model.

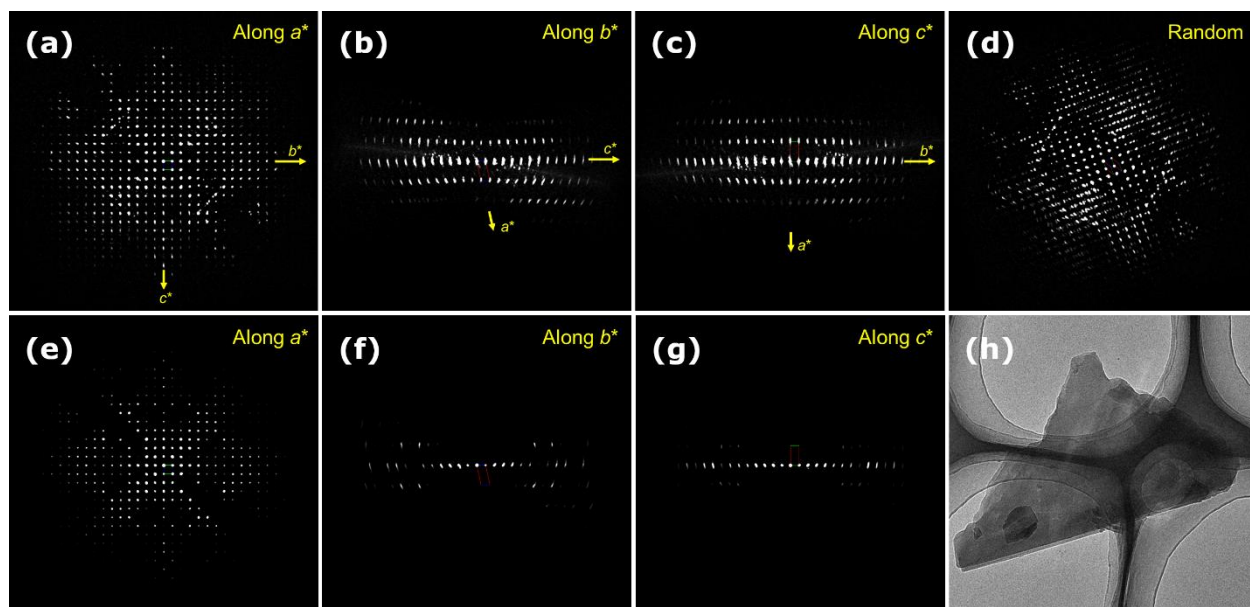

**Fig. S2.** (a – d) projection view of the 3D reciprocal lattice of V-TBAPy, (e – g) 2D slices from the reconstructed 3D reciprocal lattice as obtained from the 3D ED data, and (h) low magnification bright-field image of the crystal.

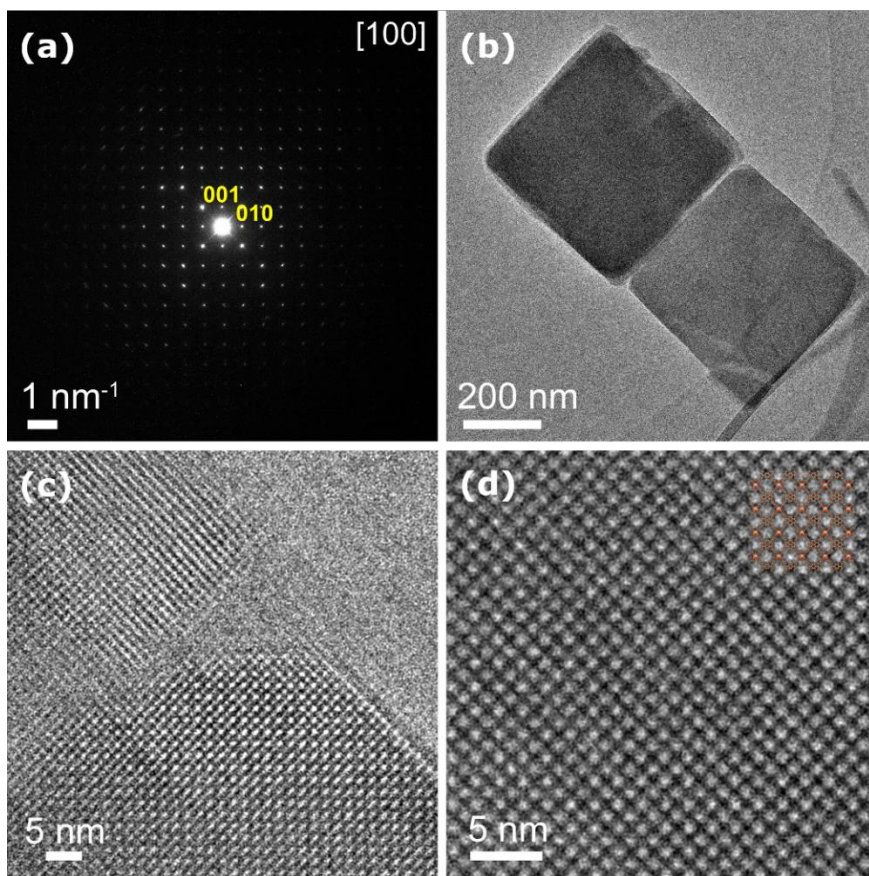

**Fig. S3.** (a) Selected area electron diffraction pattern, (b) low magnification bright-field image, and (c – d) corresponding high-resolution TEM images of Ga-TBAPy with an insert of the structure model.

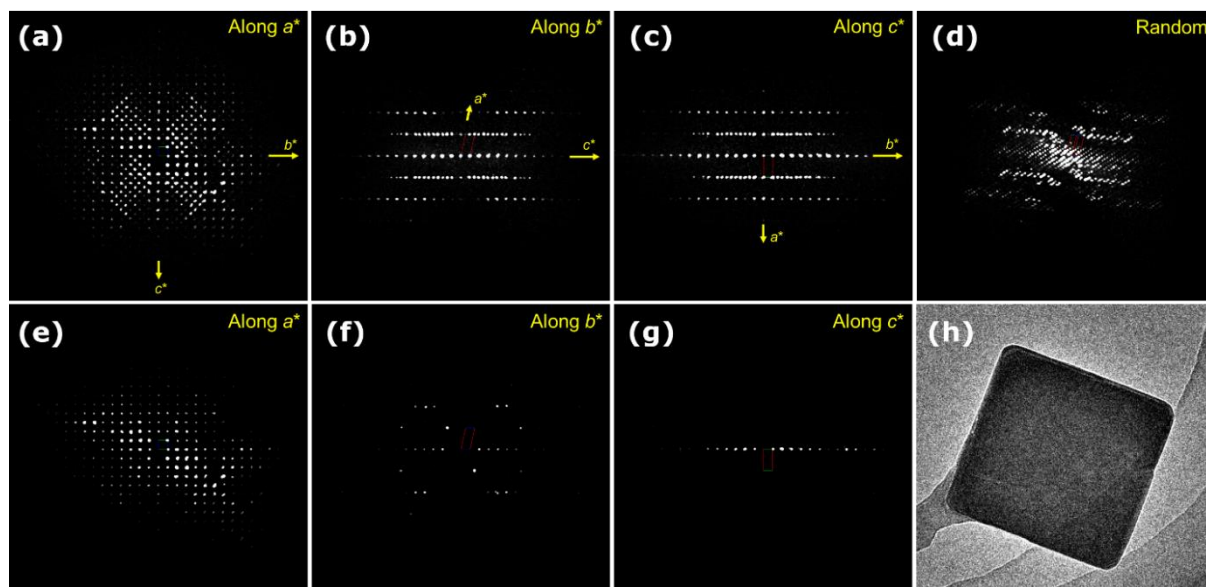

**Fig. S4.** (a – d) projection view of the 3D reciprocal lattice of Ga-TBAPy, (e – g) 2D slices from the reconstructed 3D reciprocal lattice as obtained from the 3D ED data, and (h) low magnification bright-field image of the crystal.

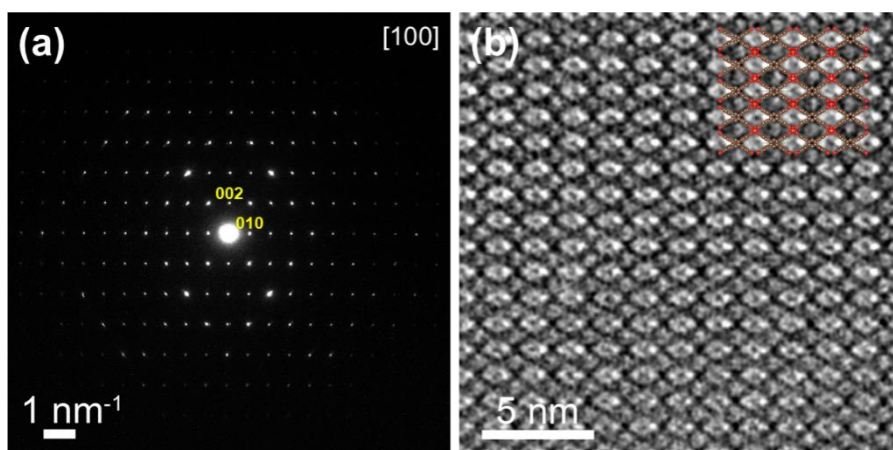

**Fig. S5.** (a) Selected area electron diffraction pattern and (b) the corresponding high-resolution TEM image of V-TCPB with an insert of the structure model.

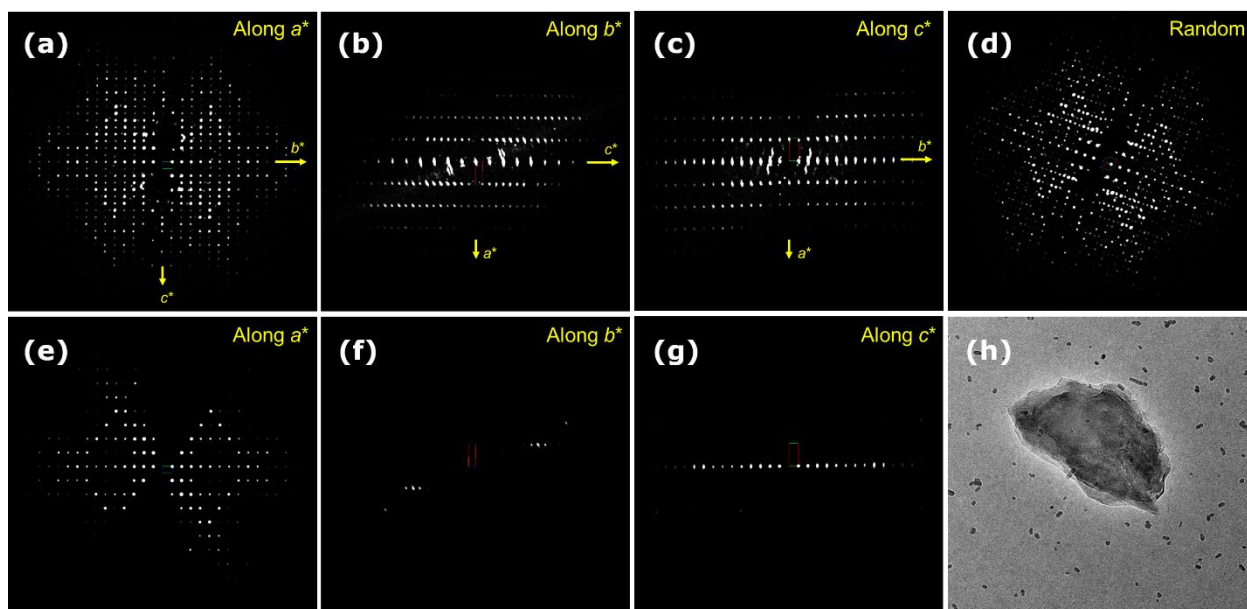

**Fig. S6.** (a – d) projection view of the 3D reciprocal lattice of V-TCPB, (e – g) 2D slices from the reconstructed 3D reciprocal lattice as obtained from the 3D ED data, and (h) low magnification bright-field image of the crystal.

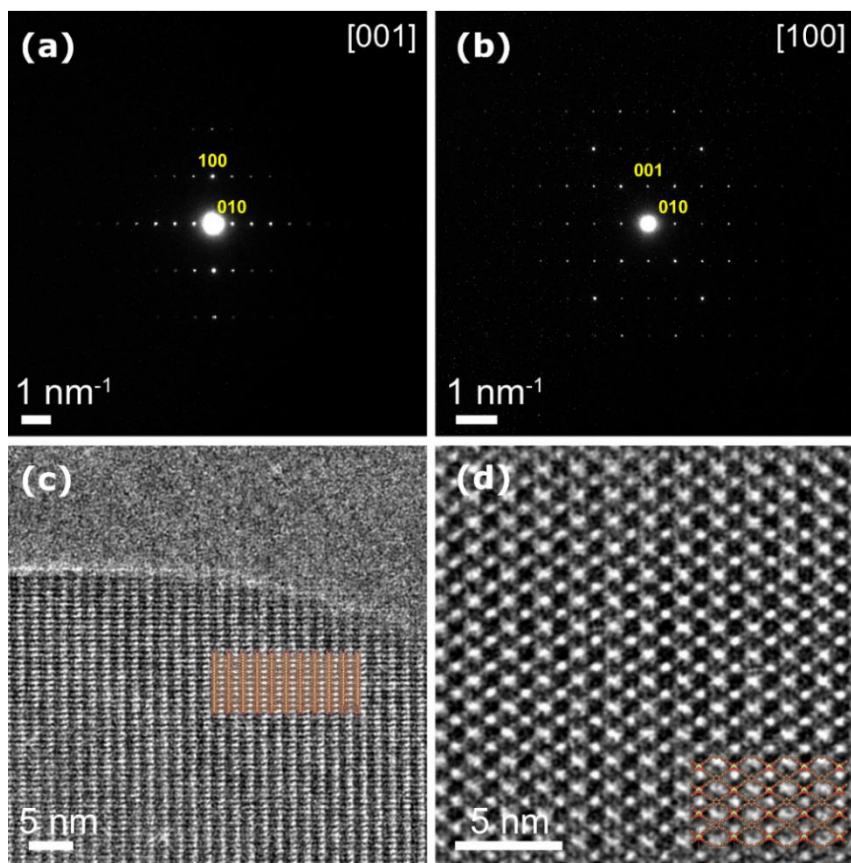

**Fig. S7.** (a – b) Selected area electron diffraction patterns and (c – d) the corresponding high-resolution TEM images of Ga-TCPB with inserts of the structure model.

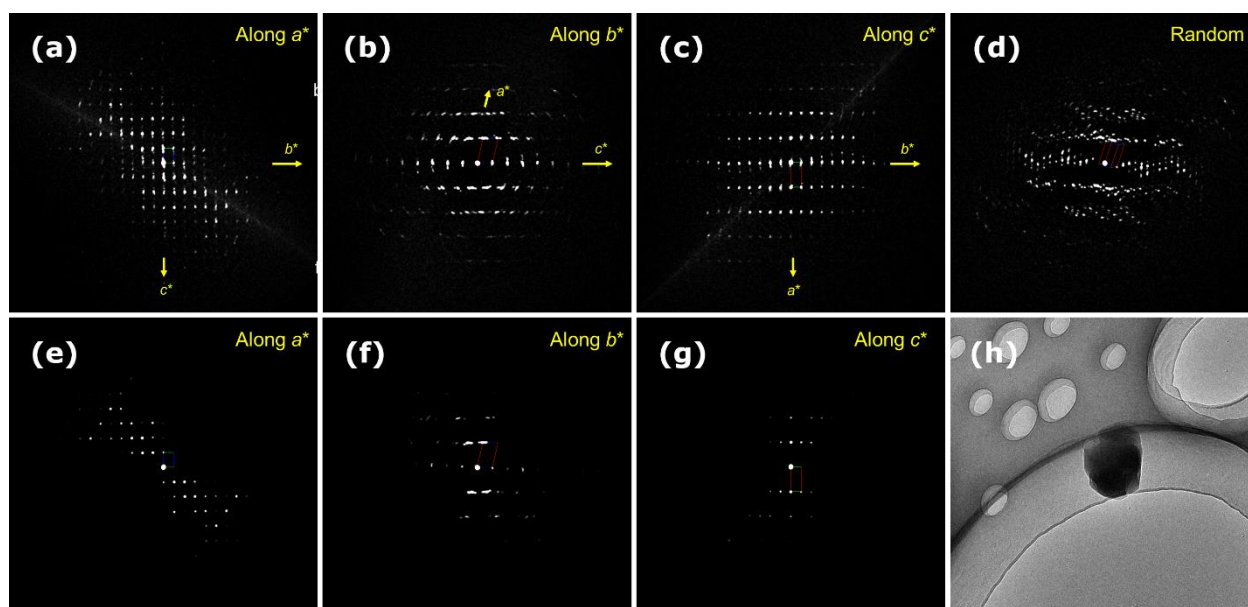

**Fig. S8.** (a – d) projection view of the 3D reciprocal lattice of Ga-TCPB, (e – g) 2D slices from the reconstructed 3D reciprocal lattice as obtained from the 3D ED data, and (h) low magnification bright-field image of the crystal.

**Table S1.** 3D crystallographic data and refinement details of V- and Ga-based MOFs.

|                                         | <b>V-TBAPy</b>                        | <b>Ga-TBAPy</b>                           | <b>V-TCPB</b>                        | <b>Ga-TCPB</b>                           |
|-----------------------------------------|---------------------------------------|-------------------------------------------|--------------------------------------|------------------------------------------|
| Composition                             | V <sub>2</sub> O <sub>2</sub> (TBAPy) | Ga <sub>2</sub> (OH) <sub>2</sub> (TBAPy) | V <sub>2</sub> O <sub>2</sub> (TCPB) | Ga <sub>2</sub> (OH) <sub>2</sub> (TCPB) |
| Crystal system                          | Monoclinic                            | Monoclinic                                | Orthorhombic                         | Monoclinic                               |
| Space group                             | <i>P2/m</i>                           | <i>P2/m</i>                               | <i>Pcma</i>                          | <i>P2/m</i>                              |
| <i>a</i> (Å)                            | 6.760                                 | 6.698                                     | 6.496                                | 6.504                                    |
| <i>b</i> (Å)                            | 15.696                                | 15.321                                    | 15.835                               | 15.971                                   |
| <i>c</i> (Å)                            | 15.638                                | 16.095                                    | 21.590                               | 10.970                                   |
| $\alpha$ (°)                            | 90                                    | 90                                        | 90                                   | 90                                       |
| $\beta$ (°)                             | 103.4                                 | 102.8                                     | 90                                   | 103.4                                    |
| $\gamma$ (°)                            | 90                                    | 90                                        | 90                                   | 90                                       |
| Volume (Å <sup>3</sup> )                | 1614.1                                | 1610.6                                    | 2220.7                               | 1108.5                                   |
| D <sub>c</sub> (g cm <sup>-3</sup> )    | 0.813                                 | 0.854                                     | 1.029                                | 1.060                                    |
| Wavelength $\lambda$ (Å)                | 0.02508 Å                             | 0.02508 Å                                 | 0.02508 Å                            | 0.02508 Å                                |
| Completeness (%)                        | 89.81                                 | 89.95                                     | 81.62                                | 67.41                                    |
| Resolution (Å)                          | 0.79 Å                                | 0.90 Å                                    | 0.74 Å                               | 0.75 Å                                   |
| <i>R</i> <sub>int</sub>                 | 0.2861                                | 0.2904                                    | 0.1464                               | 0.0907                                   |
| No. of symmetry independent reflections | 3235                                  | 2082                                      | 2411                                 | 1940                                     |
| <i>R</i> <sub>1</sub>                   | 0.3540                                | -                                         | 0.2649                               | 0.1798                                   |
| <i>wR</i> <sub>2</sub>                  | 0.6919                                | -                                         | 0.5788                               | 0.5143                                   |
| <i>Goof</i>                             | 2.135                                 | -                                         | 1.963                                | 1.373                                    |



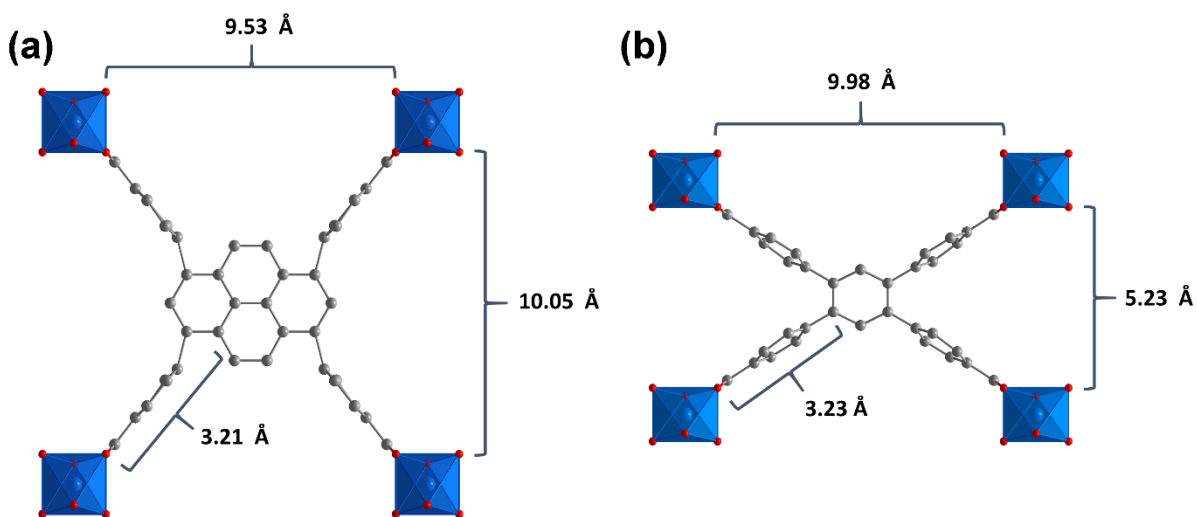

**Fig. S9.** Summary of dimensional differences between TBAPy- and TCPB-linkers in Ga-TBAPy and Ga-TCPB.

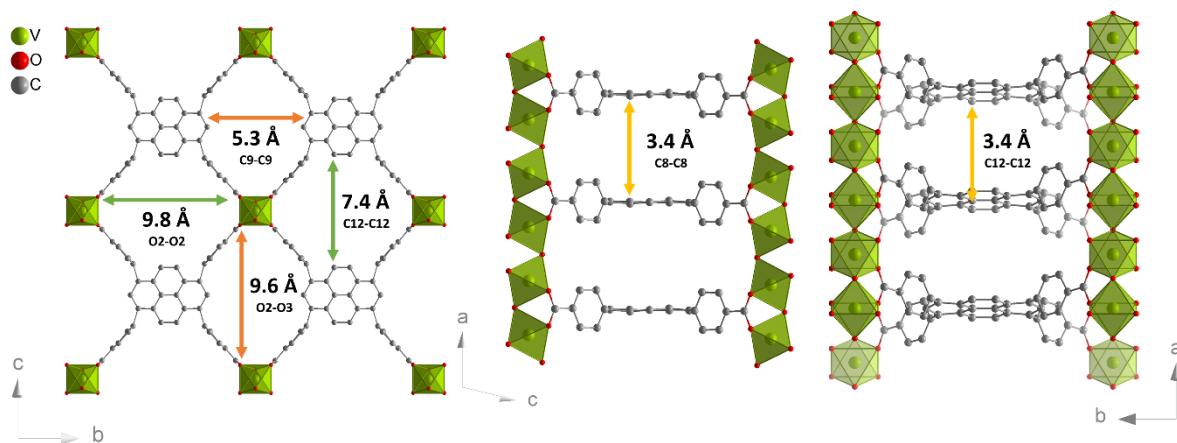

**Fig. S10.** Crystal structure of V-TBAPy as viewed along [001], [010], and [001] along with estimated pore diameters obtained by taking the van der Waals radii of the atoms into account.

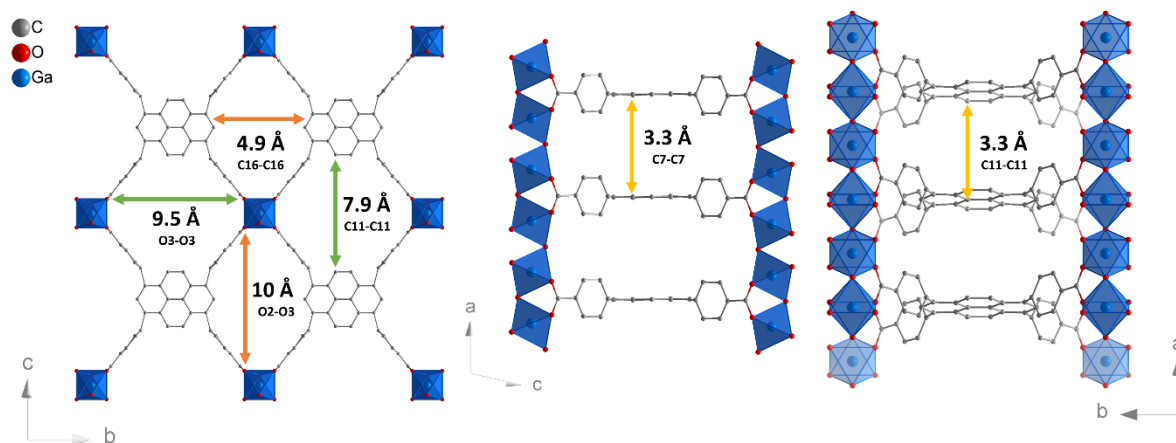

202

**Fig. S11.** Crystal structure of Ga-TBAPy as viewed along [001], [010], and [001] along with estimated pore diameters obtained by taking the van der Waals radii of the atoms into account.

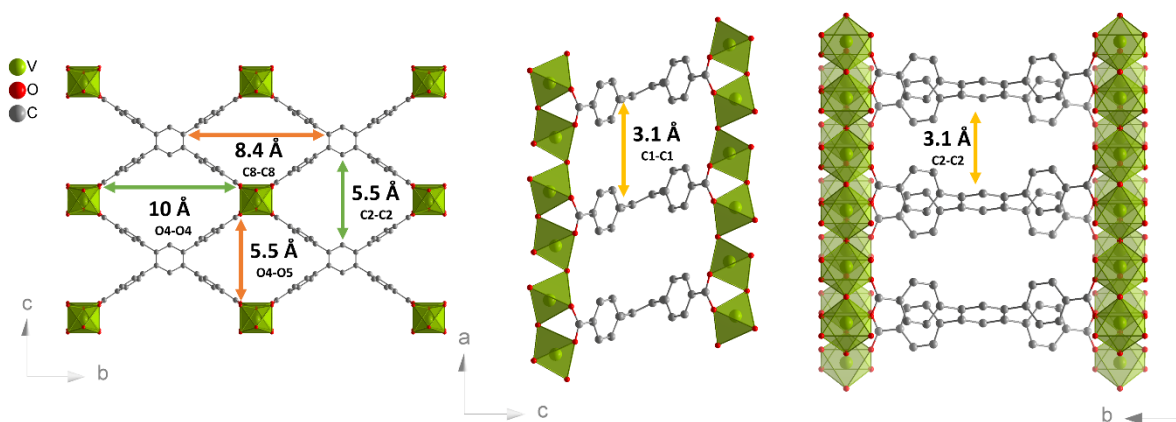

**Fig. S12.** Crystal structure of Ga-TCPB as viewed along [001], [010], and [001] along with estimated pore diameters obtained by taking the van der Waals radii of the atoms into account.

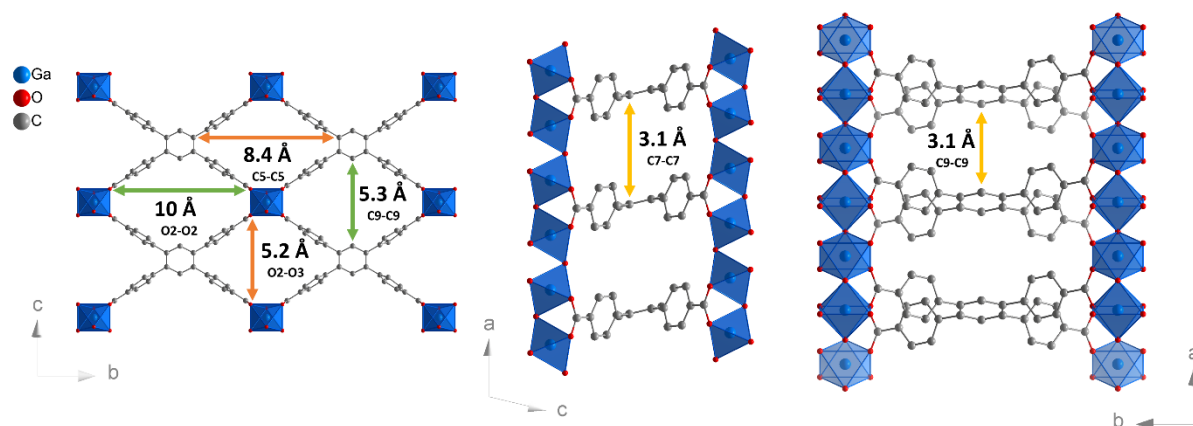

**Fig. S13.** Crystal structure of V-TCPB as viewed along [001], [010], and [001] along with estimated pore diameters obtained by taking the van der Waals radii of the atoms into account.

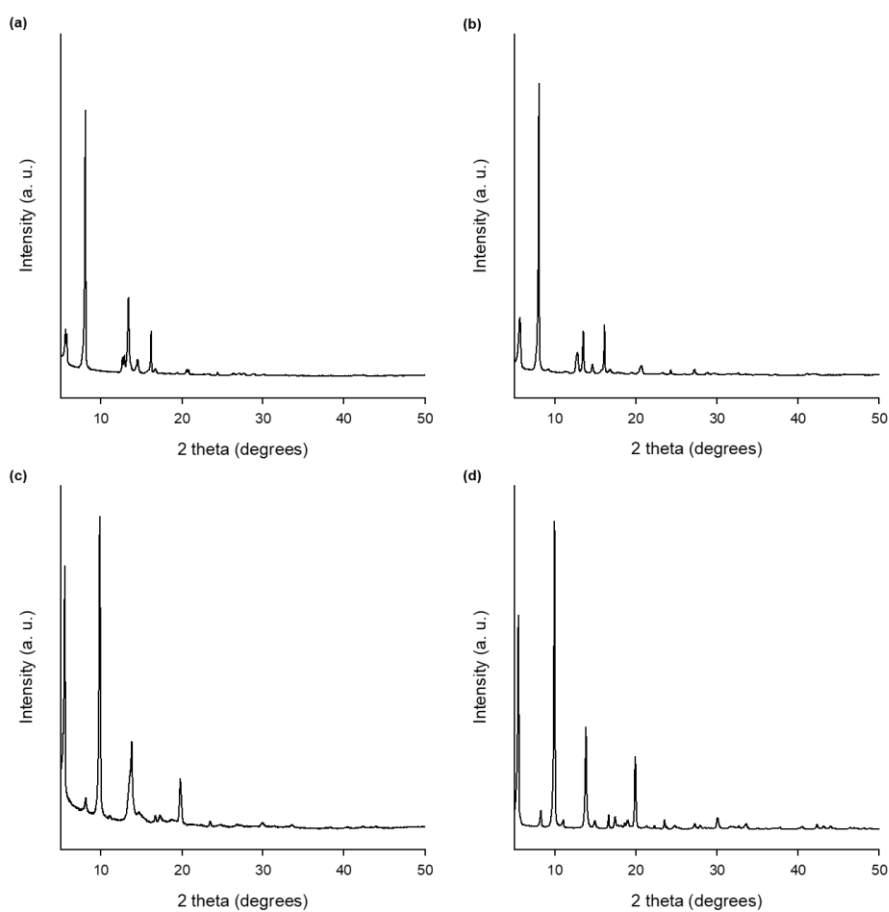

**Fig. S14.** Powder X-ray diffraction ( $\lambda = 1.5418 \text{ \AA}$ ) patterns of (a) V-TBAPy, (b) Ga-TBAPy, (c) V-TCPB, and (d) Ga-TCPB.

**Table S2.** Atomic parameters obtained from Rietveld refinement of V-TBAPy<sup>a</sup>.

| Atom | Occupancy | x          | y           | z           | $U_{iso}$ (Å <sup>2</sup> ) |
|------|-----------|------------|-------------|-------------|-----------------------------|
| V1   | 1.0       | 0          | 0           | 0.5         | 0.024 (2) <sup>b</sup>      |
| V2   | 1.0       | 0.5        | 0           | 0.5         | 0.024 (2) <sup>b</sup>      |
| O1   | 1.0       | 0.781 (8)  | 0           | 0.556 (7)   | 0.02 (1) <sup>b</sup>       |
| O2   | 1.0       | 0.890 (4)  | 0.894 (6)   | 0.433 (5)   | 0.02 (1) <sup>b</sup>       |
| O3   | 1.0       | 0.610 (4)  | 0.923 (8)   | 0.403 (9)   | 0.02 (1) <sup>b</sup>       |
| C1   | 1.0       | 0.740 (3)  | 0.842 (3)   | 0.393 (4)   | 0.011 (7) <sup>b</sup>      |
| C2   | 1.0       | 0.768 (6)  | 0.7915 (13) | 0.3151 (13) | 0.011 (7) <sup>b</sup>      |
| C3   | 1.0       | 0.758 (4)  | 0.8318 (13) | 0.237 (2)   | 0.011 (7) <sup>b</sup>      |
| C4   | 1.0       | 0.587 (4)  | 0.8182 (13) | 0.165 (3)   | 0.011 (7) <sup>b</sup>      |
| C5   | 1.0       | 0.539 (8)  | 0.7265 (13) | 0.1600 (14) | 0.011 (7) <sup>b</sup>      |
| C6   | 1.0       | 0.557 (7)  | 0.6824 (16) | 0.241 (2)   | 0.011 (7) <sup>b</sup>      |
| C7   | 1.0       | 0.671 (11) | 0.717 (2)   | 0.3173 (12) | 0.011 (7) <sup>b</sup>      |
| C8   | 1.0       | 0.550 (5)  | 0.6807 (9)  | 0.0826 (9)  | 0.011 (7) <sup>b</sup>      |
| C9   | 1.0       | 0.5        | 0.722 (3)   | 0           | 0.011 (7) <sup>b</sup>      |
| C10  | 1.0       | 0.5        | 0.5442 (15) | 0.5         | 0.011 (7) <sup>b</sup>      |
| C11  | 1.0       | 0.542 (12) | 0.5900 (6)  | 0.0822 (7)  | 0.011 (7) <sup>b</sup>      |
| C12  | 1.0       | 0.570 (4)  | 0.546 (2)   | 0.1608 (19) | 0.011 (7) <sup>b</sup>      |

<sup>a</sup>The chemical composition of V-TBAPy for refinement is V<sub>2</sub>O<sub>2</sub>(C<sub>44</sub>O<sub>8</sub>). Lattice constants are  $a = 6.754(7)$  Å,  $b = 15.71(3)$  Å,  $c = 15.66(3)$  Å,  $\alpha = \gamma = 90^\circ$ ,  $\beta = 103.2(2)^\circ$ , resulting in  $V = 1619(5)$  Å<sup>3</sup>. Agreement indices are  $GoF = 2.66$ ,  $R_{wp} = 8.94$ . <sup>b</sup>Atomic displacement parameters ( $U_{iso}$ ) of vanadium, oxygen, and carbon atoms in the framework are refined as a single parameter of each element.

**Table S3.** Atomic parameters obtained from Rietveld refinement of Ga-TBAPy<sup>a</sup>.

| Atom | Occupancy | x          | y           | z           | $U_{iso}$ (Å <sup>2</sup> ) |
|------|-----------|------------|-------------|-------------|-----------------------------|
| V1   | 1.0       | 0          | 0           | 0.5         | 0.005 (4) <sup>b</sup>      |
| V2   | 1.0       | 0.5        | 0           | 0.5         | 0.005 (4) <sup>b</sup>      |
| O1   | 1.0       | 0.778 (7)  | 0           | 0.556 (7)   | 0.031 (2) <sup>b</sup>      |
| O2   | 1.0       | 0.890 (4)  | 0.895 (11)  | 0.420 (7)   | 0.031 (2) <sup>b</sup>      |
| O3   | 1.0       | 0.530 (4)  | 0.911 (8)   | 0.403 (9)   | 0.031 (2) <sup>b</sup>      |
| C1   | 1.0       | 0.701 (6)  | 0.857 (4)   | 0.375 (3)   | 0.027 (7) <sup>b</sup>      |
| C2   | 1.0       | 0.699 (3)  | 0.8121 (14) | 0.2978 (11) | 0.027 (7) <sup>b</sup>      |
| C3   | 1.0       | 0.894 (2)  | 0.762 (2)   | 0.194 (2)   | 0.027 (7) <sup>b</sup>      |
| C4   | 1.0       | 0.587 (4)  | 0.8182 (13) | 0.165 (3)   | 0.027 (7) <sup>b</sup>      |
| C5   | 1.0       | 0.705 (5)  | 0.7244 (12) | 0.1468 (13) | 0.027 (7) <sup>b</sup>      |
| C6   | 1.0       | 0.550 (3)  | 0.7083 (17) | 0.194 (2)   | 0.027 (7) <sup>b</sup>      |
| C7   | 1.0       | 0.549 (3)  | 0.754 (3)   | 0.2687 (14) | 0.027 (7) <sup>b</sup>      |
| C8   | 1.0       | 0.567 (3)  | 0.6829 (8)  | 0.0788 (8)  | 0.027 (7) <sup>b</sup>      |
| C9   | 1.0       | 0.5        | 0.728 (4)   | 0           | 0.027 (7) <sup>b</sup>      |
| C10  | 1.0       | 0.5        | 0.5452 (12) | 0.5         | 0.027 (7) <sup>b</sup>      |
| C11  | 1.0       | 0.543 (5)  | 0.5914 (5)  | 0.0787 (6)  | 0.027 (7) <sup>b</sup>      |
| C12  | 1.0       | 0.567 (16) | 0.543 )     | 0.1558 (15) | 0.027 (7) <sup>b</sup>      |

<sup>a</sup>The chemical composition of Ga-TBAPy for refinement is Ga<sub>2</sub>O<sub>2</sub>(C<sub>44</sub>O<sub>8</sub>). Lattice constants are  $a = 6.697(5)$  Å,  $b = 15.366(17)$  Å,  $c = 16.01(2)$  Å,  $\alpha = \gamma = 90^\circ$ ,  $\beta = 101.5(1)^\circ$ , resulting in  $V = 1615(3)$  Å<sup>3</sup>. Agreement indices are  $GoF = 3.38$ ,  $R_{wp} = 9.43$ . <sup>b</sup>The atomic displacement parameters ( $U_{iso}$ ) of gallium, oxygen, and carbon atoms in the framework are refined as a single parameter of each element.

**Table S4.** Atomic parameters obtained from Rietveld refinement of V-TCPB<sup>a</sup>.

| Atom | Occupancy | x          | y           | z           | $U_{iso}$ (Å <sup>2</sup> ) |
|------|-----------|------------|-------------|-------------|-----------------------------|
| V1   | 1.0       | 0.310 (3)  | 0           | 0.743 (6)   | 0.08 (7)                    |
| O1   | 1.0       | 0.310 (2)  | 0.907 (17)  | 0.809 (9)   | 0.02 (8) <sup>b</sup>       |
| O2   | 1.0       | 0.550 (5)  | 0           | 0.810 (3)   | 0.02 (8) <sup>b</sup>       |
| O3   | 1.0       | 0.020 (5)  | 0.930 (2)   | 0.800 (11)  | 0.02 (8) <sup>b</sup>       |
| C1   | 1.0       | 0.137 (4)  | 0.890 (3)   | 0.846 (4)   | 0.020 (13) <sup>b</sup>     |
| C2   | 1.0       | 0.097 (3)  | 0.8097 (15) | 0.871 (3)   | 0.020 (13) <sup>b</sup>     |
| C3   | 1.0       | 0.020 (3)  | 0.6536 (11) | 0.9270 (16) | 0.020 (13) <sup>b</sup>     |
| C4   | 1.0       | 0.252 (2)  | 0.757 (3)   | 0.890 (5)   | 0.020 (13) <sup>b</sup>     |
| C5   | 1.0       | 0.213 (3)  | 0.6777 (15) | 0.915 (3)   | 0.020 (13) <sup>b</sup>     |
| C6   | 1.0       | -0.093 (3) | 0.7902 (18) | 0.892 (4)   | 0.020 (13) <sup>b</sup>     |
| C7   | 1.0       | -0.132 (3) | 0.711 (2)   | 0.918 (4)   | 0.020 (13) <sup>b</sup>     |
| C8   | 1.0       | -0.019 (5) | 0.583 (2)   | 0.9649 (13) | 0.020 (13) <sup>b</sup>     |
| C9   | 1.0       | 0          | 0.5         | 0.941 (2)   | 0.020 (13) <sup>b</sup>     |

<sup>a</sup>The chemical composition of V-TCPB for refinement is  $V_2O_2(C_{34}O_8)$ . Lattice constants are  $a = 6.822(13)$  Å,  $b = 15.84(5)$  Å,  $c = 21.59(3)$  Å,  $\alpha = \beta = \gamma = 90^\circ$ , resulting in  $V = 2333(9)$  Å<sup>3</sup>. Agreement indices are  $GoF = 2.14$ ,  $R_{wp} = 7.64$ . <sup>b</sup>The atomic displacement parameters ( $U_{iso}$ ) of vanadium, oxygen, and carbon atoms in the framework are refined as a single parameter of each element.

**Table S5.** Atomic parameters obtained from Rietveld refinement of Ga-TCPB<sup>a</sup>.

| Atom | Occupancy | x           | y            | z            | $U_{iso}$ (Å <sup>2</sup> ) <sup>b</sup> |
|------|-----------|-------------|--------------|--------------|------------------------------------------|
| Ga1  | 1.0       | 0           | 0            | 0.5          | 0.006 (4) <sup>b</sup>                   |
| Ga2  | 1.0       | 0.5         | 0            | 0.5          | 0.006 (2) <sup>b</sup>                   |
| O1   | 1.0       | 0.781 (2)   | 0            | -0.390 (3)   | 0.02 (1) <sup>b</sup>                    |
| O2   | 1.0       | 0.120 (4)   | -0.082 (6)   | -0.366 (3)   | 0.02 (1) <sup>b</sup>                    |
| O3   | 1.0       | 0.460 (2)   | -0.093 (9)   | -0.389 (9)   | 0.02 (1) <sup>b</sup>                    |
| C1   | 1.0       | 0.326 (3)   | -0.120 (3)   | -0.328 (5)   | 0.004 (5) <sup>b</sup>                   |
| C2   | 1.0       | 0.3763 (19) | -0.1911 (11) | -0.254 (2)   | 0.004 (5) <sup>b</sup>                   |
| C3   | 1.0       | 0.219 (2)   | -0.2320 (13) | -0.216 (3)   | 0.004 (5) <sup>b</sup>                   |
| C4   | 1.0       | 0.573 (2)   | -0.2302 (13) | -0.234 (3)   | 0.004 (5) <sup>b</sup>                   |
| C5   | 1.0       | 0.606 (2)   | -0.3109 (12) | -0.184 (3)   | 0.004 (5) <sup>b</sup>                   |
| C6   | 1.0       | 0.255 (2)   | -0.3128 (12) | -0.166 (2)   | 0.004 (5) <sup>b</sup>                   |
| C7   | 1.0       | 0.4529 (18) | -0.3491 (8)  | -0.1415 (16) | 0.004 (5) <sup>b</sup>                   |
| C8   | 1.0       | 0.501 (3)   | -0.4233 (18) | -0.069 (2)   | 0.004 (5) <sup>b</sup>                   |
| C9   | 1.0       | 0.415(18)   | 0.5          | -0.122(4)    | 0.04 ) <sup>b</sup>                      |

<sup>a</sup>The chemical composition of Ga-TCPB for refinement is Ga<sub>2</sub>O<sub>2</sub>(C<sub>34</sub>O<sub>8</sub>). Lattice constants are  $a = 6.695(5)$  Å,  $b = 16.05(2)$  Å,  $c = 11.228(10)$  Å,  $\alpha = \gamma = 90^\circ$ ,  $\beta = 107.84(11)^\circ$ , resulting in  $V = 1149(2)$  Å<sup>3</sup>. Agreement indices are  $GoF = 3.27$ ,  $R_{wp} = 9.59$ . <sup>b</sup> The atomic displacement parameters ( $U_{iso}$ ) of gallium, oxygen, and carbon atoms in the framework are refined as a single parameter of each element.

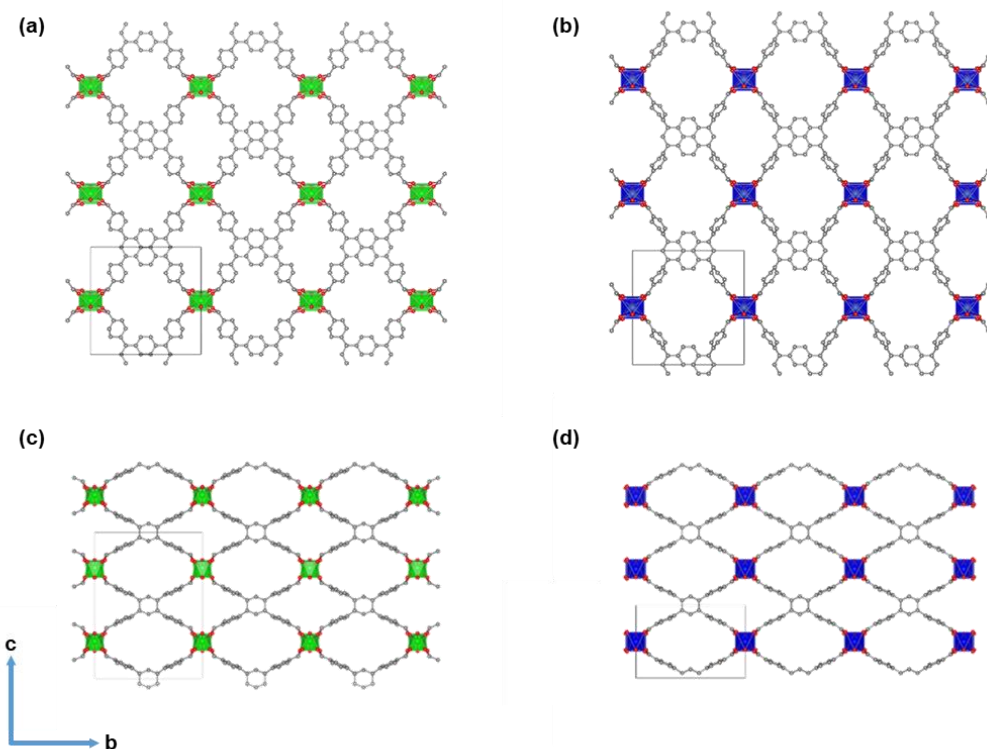

**Fig. S15.** Atomic configuration of (a) V-TBAPy, (b) Ga-TBAPy, (c) V-TCPB, and (d) Ga-TCPB along [100], drawn based on the crystal structure as determined by Rietveld refinement: V and VO<sub>6</sub> unit (green), Ga and GaO<sub>6</sub> unit (blue), O (red), and C (grey).

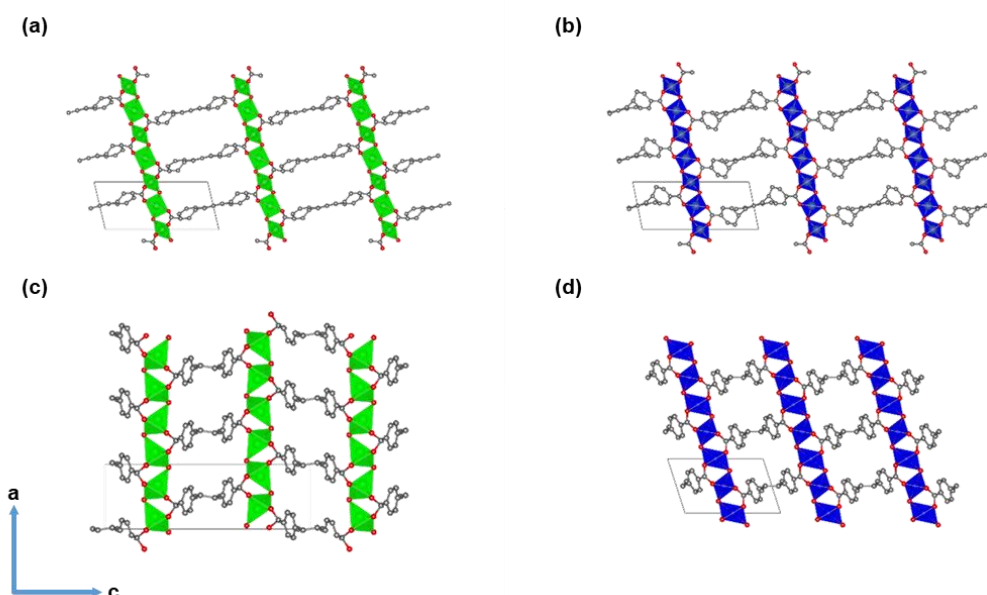

**Fig. S16.** Atomic configuration of (a) V-TBAPy, (b) Ga-TBAPy, (c) V-TCPB, and (d) Ga-TCPB along [010], drawn based on the crystal structure as determined by Rietveld refinement: V and VO<sub>6</sub> unit (green), Ga and GaO<sub>6</sub> unit (blue), O (red), and C (grey).



### Section S3. X-ray photoelectron spectroscopy

Survey and high-resolution core-level X-ray photoelectron spectroscopy (XPS) spectra were recorded on an Ulvac-PHI Quantera II XPS Scanning Microprobe using monochromatic Al K $\alpha$  as an X-ray source. All measurements were conducted under a constant exposure of low-energy electrons and argon ions in order to avoid charge build-up. Both the core-level spectra of V2p could be deconvoluted as two single-component peaks, indicating that the MOFs contain a single vanadium species. Furthermore, binding energies for V2p<sub>3/2</sub> and V2p<sub>1/2</sub> (Table S6) was measured to be 515.78 eV, 523.13 eV and 515.95 eV, 523.30 eV for V-TBAPy and V-TCPB, respectively, and a difference in binding energy between O1s and V2p<sub>3/2</sub> was calculated to be 14.60 and 14.61, indicating that the oxidation state of vanadium in both MOFs is V(IV)<sup>10, 11</sup>.

The presence of Si in the survey spectra comes from the substrates (silicon wafers) that the MOFs were placed on during the measurements.

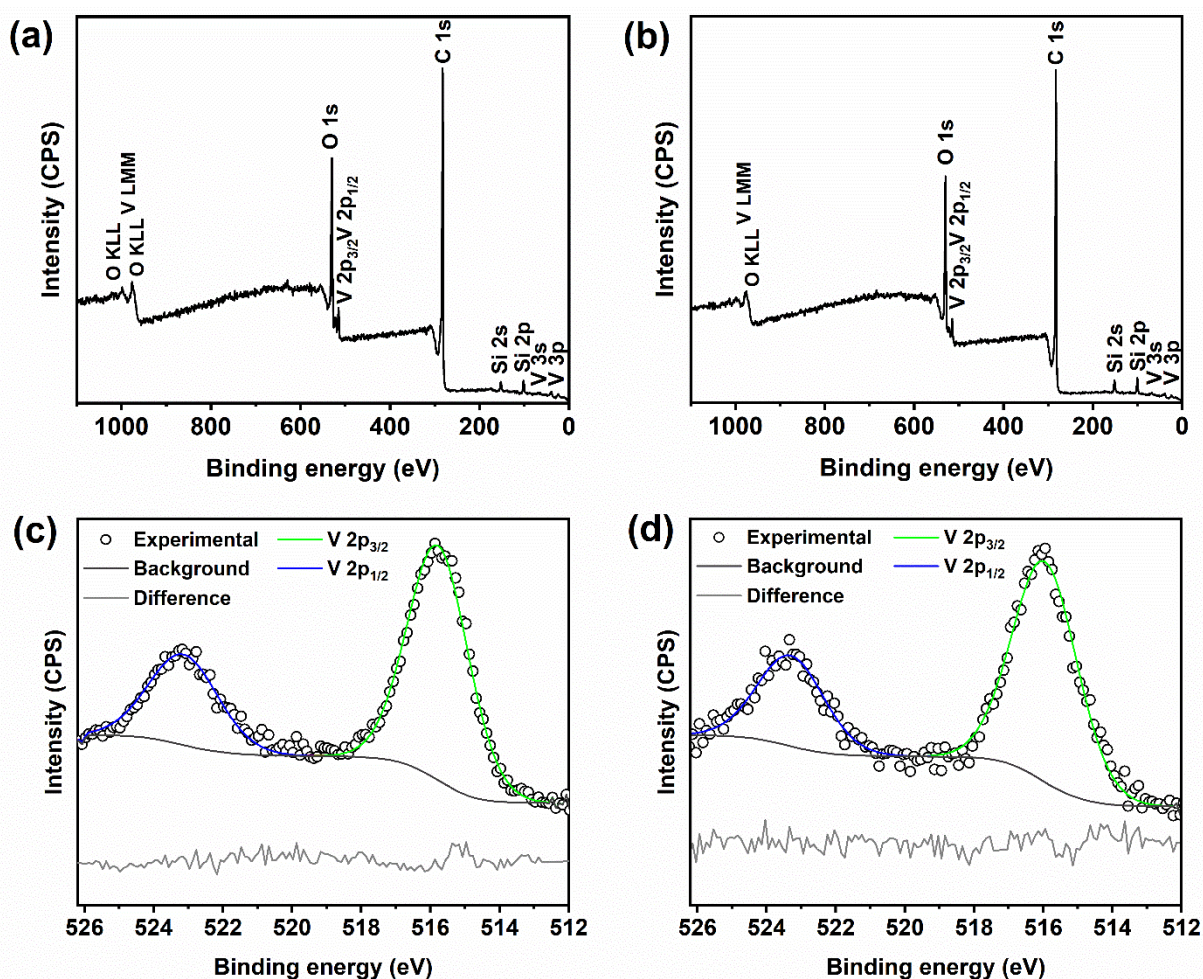

**Fig. S17.** XPS (a – b) survey and core-level (c – d) spectra of (a)/(c) V-TBAPy and (b)/(d) V-TCPB.

**Table S6.** Summary of V2p and O1s peak fit parameters for V-TBAPy and V-TCPB.

| Sample                                                | V-TBAPy | V-TCPB |
|-------------------------------------------------------|---------|--------|
| <b>Binding energy (eV)</b>                            |         |        |
| V2p <sub>3/2</sub>                                    | 515.78  | 515.95 |
| V2p <sub>1/2</sub>                                    | 523.13  | 523.30 |
| O1s                                                   | 530.38  | 530.50 |
| $\Delta$ (V2p <sub>1/2</sub> and V2p <sub>3/2</sub> ) | 7.35    | 7.35   |
| $\Delta$ (O1s and V2p <sub>3/2</sub> )                | 14.60   | 14.61  |

### Section S4. Stability study

The chemical stability of the as-synthesized MOFs was evaluated by soaking 8 mg of each material in 5 ml of the following solutions; 1 M HCl, deionized water, 1 M NaOH, MeOH, EtOH, toluene, and acetone, for 24 h whilst stirring at 300 rpm. The materials were thereafter collected by centrifugation at 3,800 rpm for 10 min and analyzed using PXRD, Figure S17 – S18. All samples can be observed to have low stability in strongly acidic or basic solutions after 24 h. The frameworks can be seen to either partially decompose or fully dissolve after having been left stirring in these solutions, indicating that the coordination between the metal ions and organic linkers may be vulnerable to gradual replacement in these conditions. The structural stability of MOFs in all other solutions and solvents was found to be high, with only minor changes in crystallinity possibly connected to the adsorption of molecules into the frameworks. The thermal stability of MOFs was studied in air (60 ml min<sup>-1</sup> flow-rate) using thermogravimetric analysis (TGA), Figure S19. All samples were found to remain stable up to 350 °C, with the Ga-based MOFs showing significantly higher thermal stability (decomposing at approx. 450 °C).

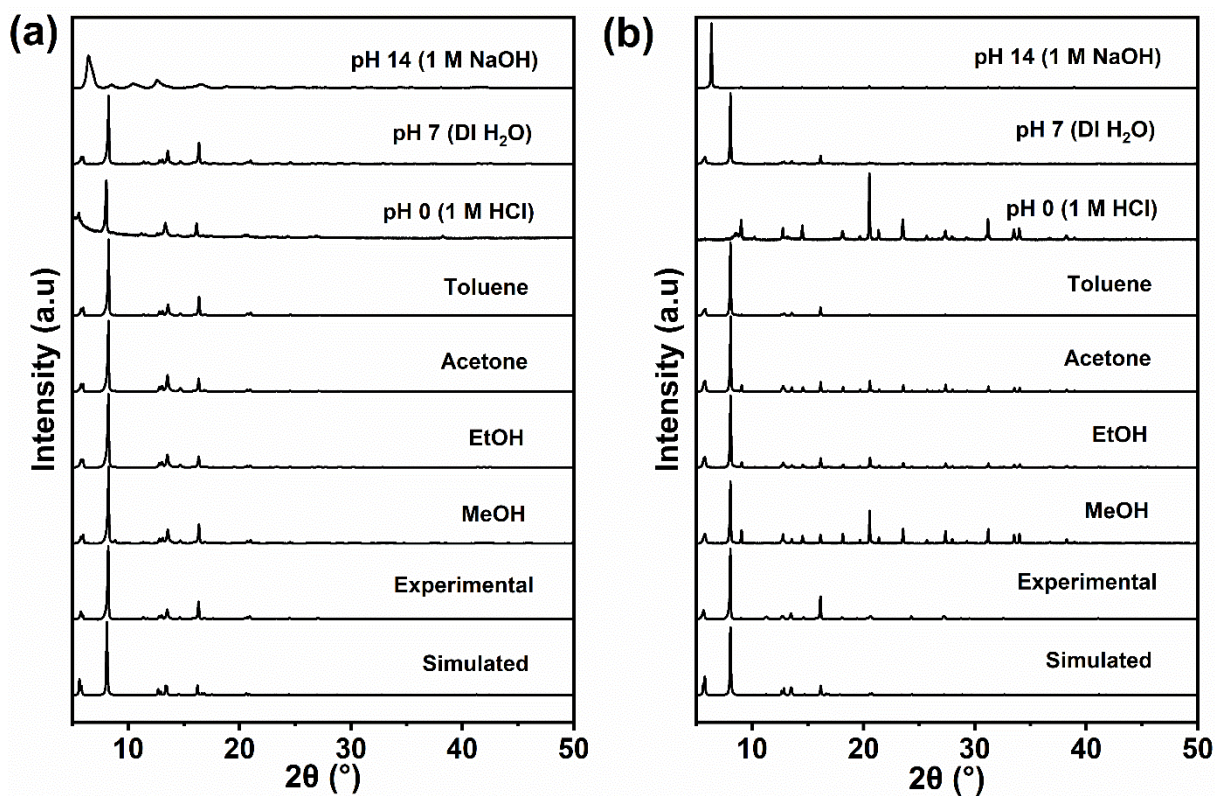

Fig. S18. X-ray powder diffractograms of (a) V-TBAPy and (b) Ga-TBAPy

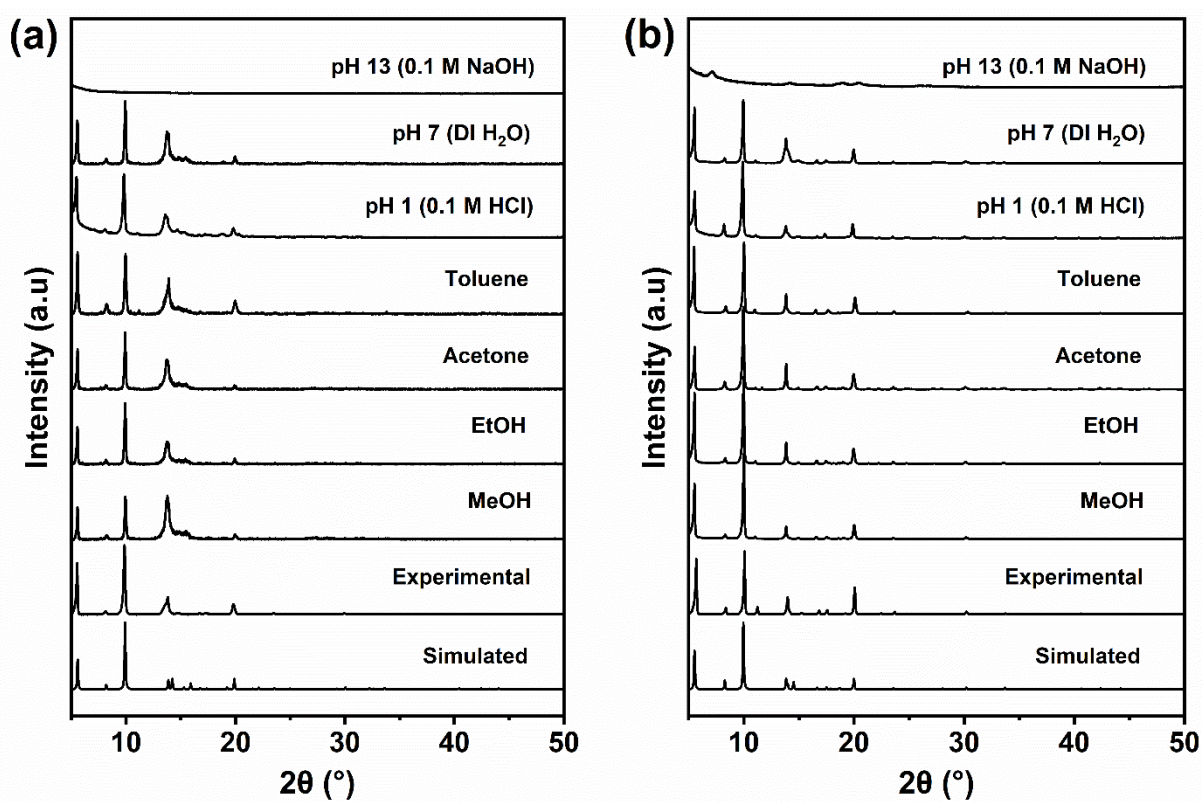

Fig. S19. X-ray powder diffractograms of (a) V-TCPB and (b) Ga-TCPB

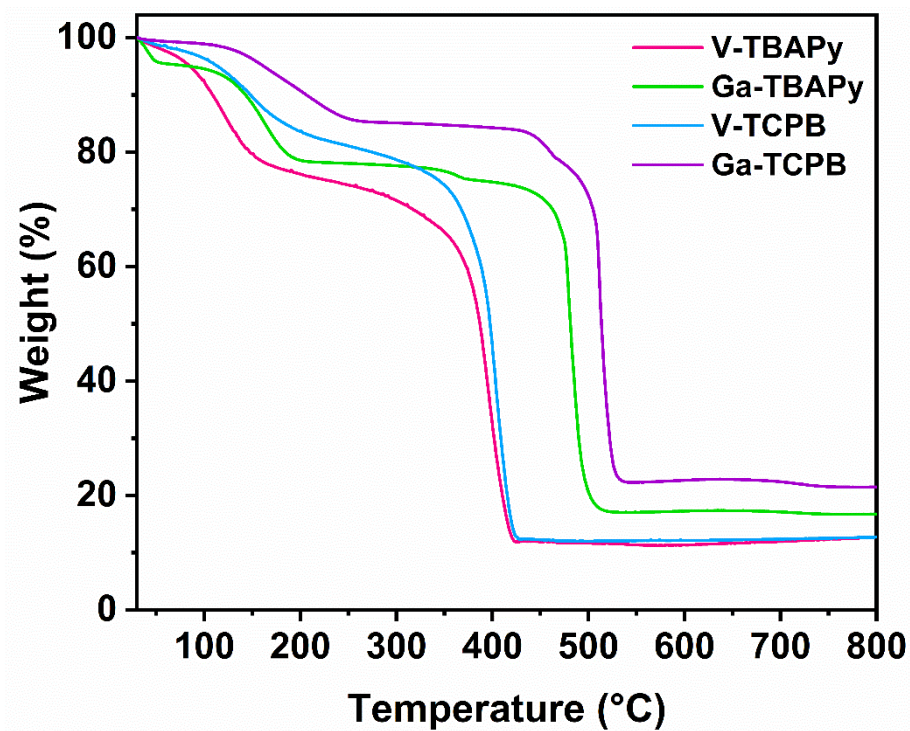

**Fig. S20.** Thermogravimetric decomposition profiles of Ga- and V-based MOFs.

### Section S5. Scanning electron microscopy images

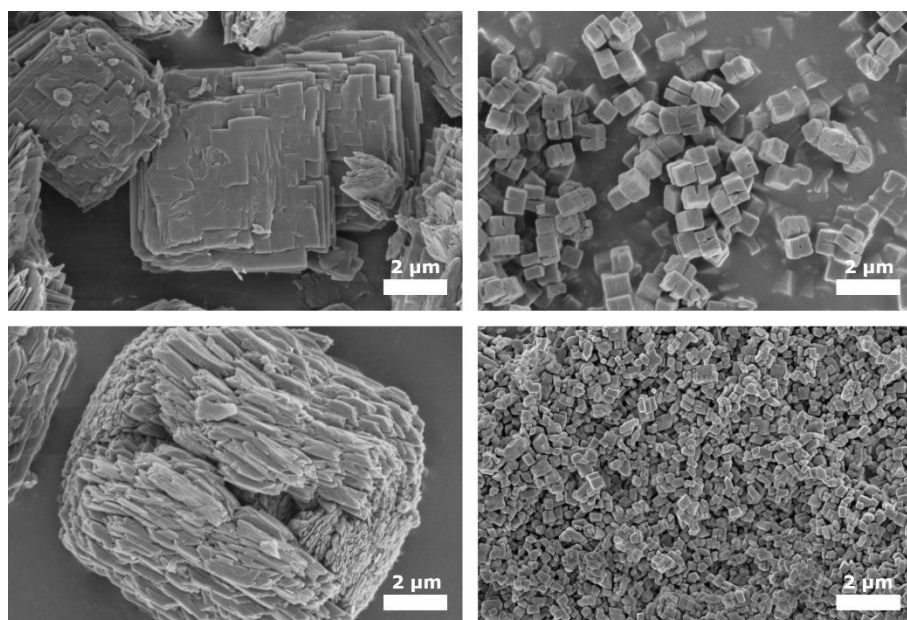

**Fig. S21.** Scanning electron microscopy images of (a) V-TBAPy, (b) Ga-TBAPy, (c) V-TCPB, and (d) Ga-TCPB.

## Section S6. Porosity and gas sorption

Gas sorption experiments were performed using a Micromeritics ASAP 2020 surface area analyzer (Norcross, GA, USA). All samples were pre-treated at 423 K for 3 h under a dynamic vacuum ( $1 \times 10^{-4}$  Pa) prior to analysis. Brunauer-Emette-Teller (BET) and Langmuir-specific surface areas were calculated from  $N_2$  adsorption isotherms recorded at 77 K. Pore size distributions were estimated using the Density Functional Theory (DFT) function in the Micromeritics MicroActive software using the  $N_2$  adsorption isotherms, the slit pore model for  $N_2$  was used for these calculations.  $SF_6$ ,  $CO_2$ ,  $CH_4$ , and  $N_2$  sorption isotherms at 283 - 303 K were also recorded using the Micromeritics ASAP 2020 surface area analyzer with an insulating water bath. Gravimetric gas adsorption profiles were obtained using a Mettler Toledo TGA/DSC 3+ (Schwerzenbach, Switzerland) using  $N_2$  as purge gas and  $SF_6$  or  $CO_2$  as measurement gas. All experiments were carried out on approx. 10 mg of material degassed at 423 K for 30 min in a  $N_2$  atmosphere ( $50 \text{ ml min}^{-1}$  flow-rate) before the sample were subjected to  $SF_6$  or  $CO_2$  at 303 K for up to 30 min ( $50 \text{ ml min}^{-1}$  flow-rate). Temperature-swing adsorption experiments were carried out under the same conditions, however using a shorter degas time of 12 min in-between each cycle.

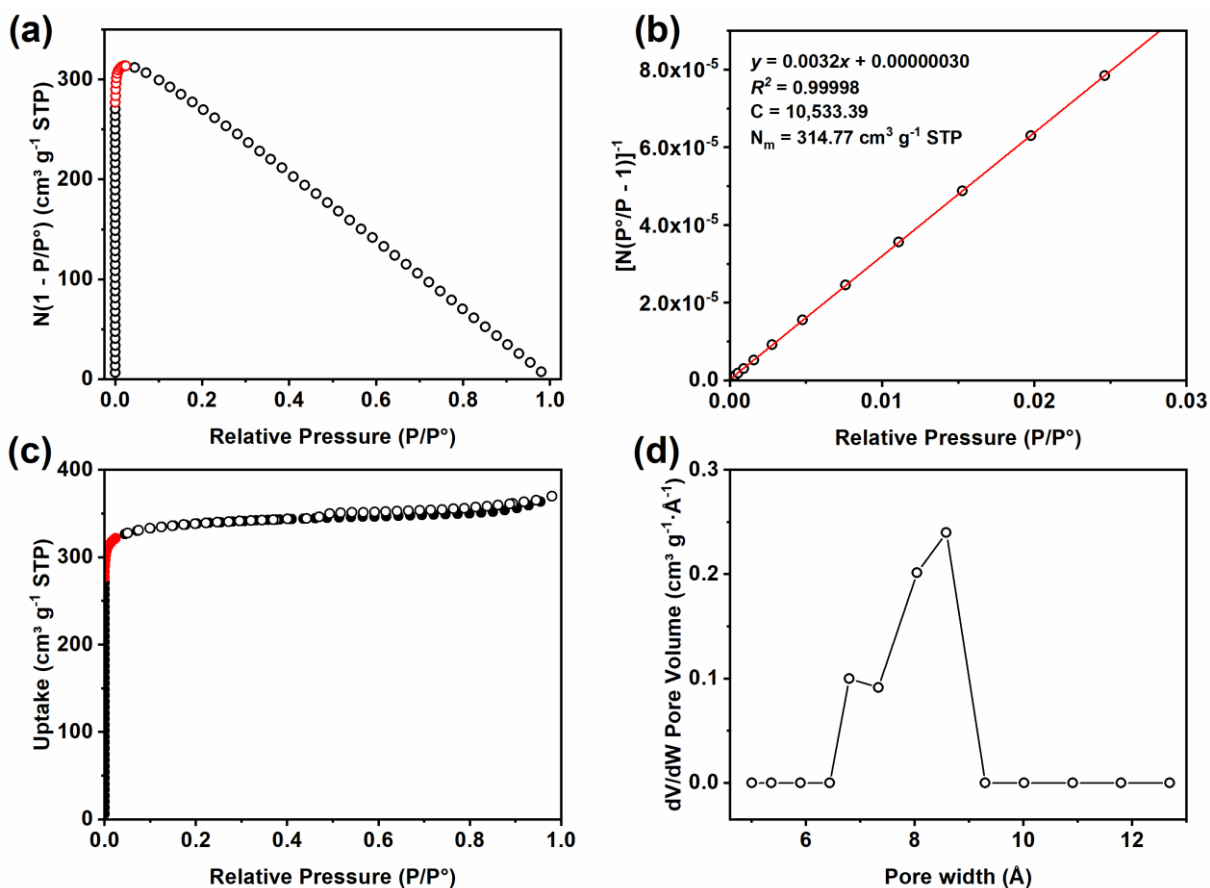

**Fig. S22.** (a) Rouquerol plot, (b) BET surface area plot showing selected points for satisfying the Rouquerol criterion, (c)  $\text{N}_2$  sorption isotherm recorded at 77 K, and (d) corresponding density-functional theory pore size distributions for V-TBAPy. Red hollow and solid spheres correspond to selected points used for calculating the BET surface area of the material. Black-filled and hollow spheres denote the adsorption and desorption branches of the  $\text{N}_2$  isotherm, respectively.

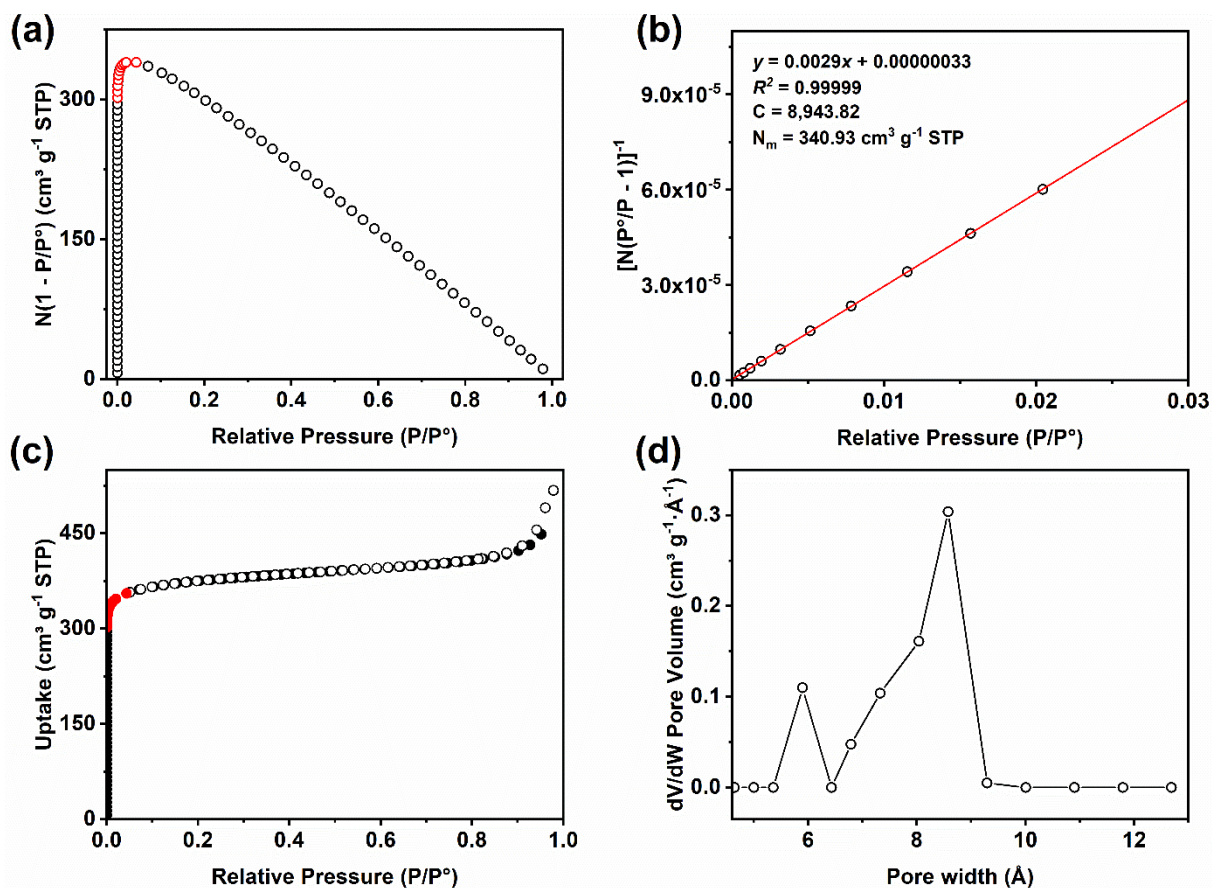

**Fig. S23.** (a) Rouquerol plot, (b) BET surface area plot showing selected points for satisfying the Rouquerol criterion, (c)  $\text{N}_2$  sorption isotherm recorded at 77 K, and (d) corresponding density-functional theory pore size distributions for Ga-TBAPy. Red hollow and solid spheres correspond to selected points used for calculating the BET surface area of the material. Black-filled and hollow spheres denote the adsorption and desorption branches of the  $\text{N}_2$  isotherm, respectively.

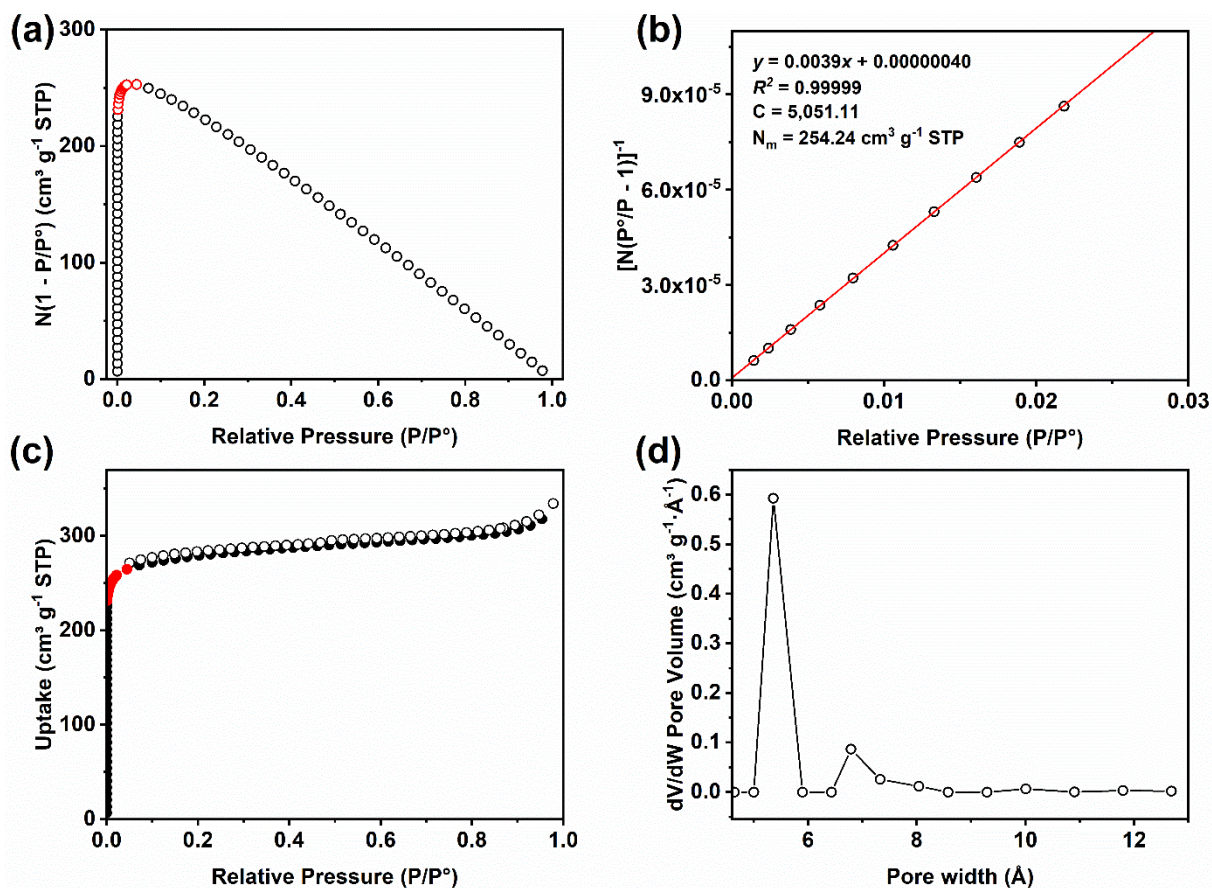

**Fig. S24.** (a) Rouquerol plot, (b) BET surface area plot showing selected points for satisfying the Rouquerol criterion, (c) N<sub>2</sub> sorption isotherm recorded at 77 K, and (d) corresponding density-functional theory pore size distributions for V-TCPB. Red hollow and solid spheres correspond to selected points used for calculating the BET surface area of the material. Black-filled and hollow spheres denote the adsorption and desorption branches of the N<sub>2</sub> isotherm, respectively.



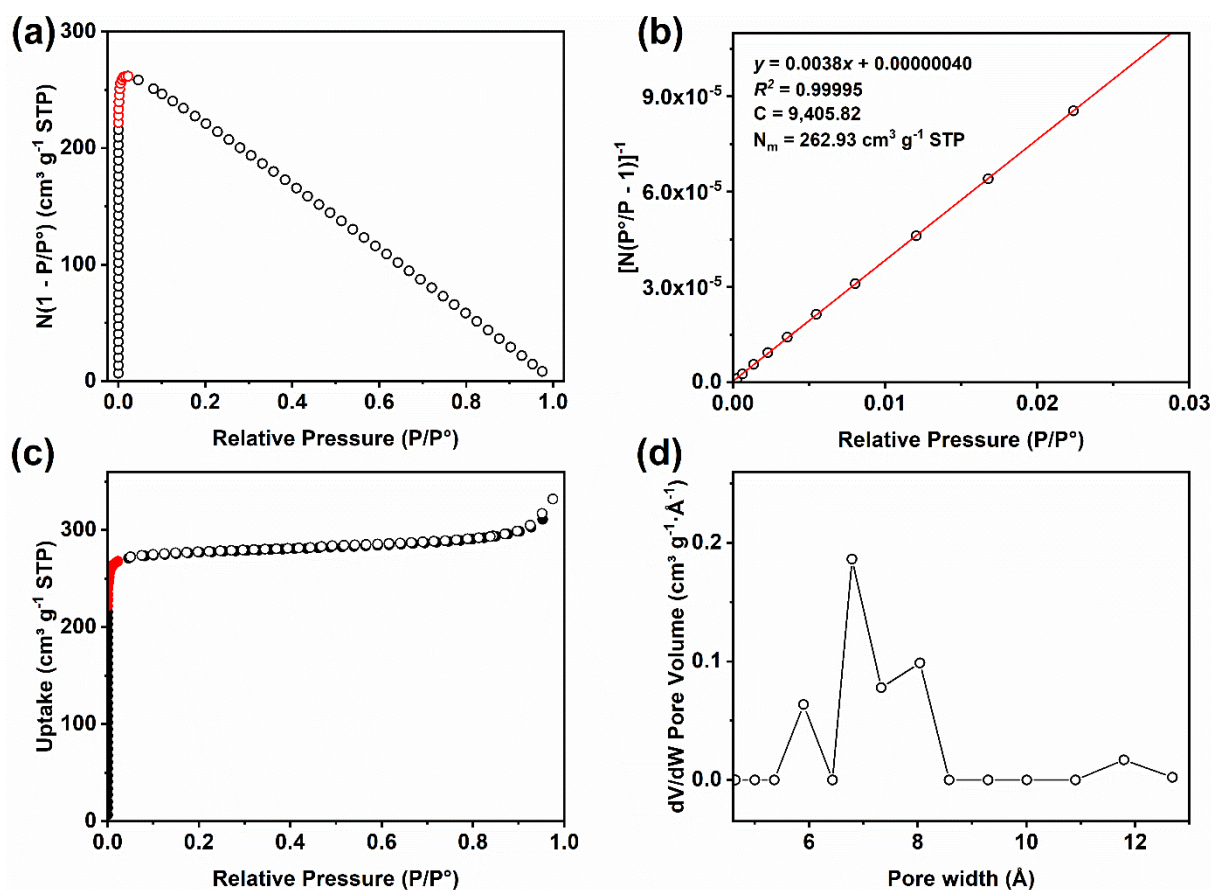

**Fig. S25.** (a) Rouquerol plot, (b) BET surface area plot showing selected points for satisfying the Rouquerol criterion, (c)  $N_2$  sorption isotherm recorded at 77 K, and (d) corresponding density-functional theory pore size distributions for Ga-TCPB. Red hollow and solid spheres correspond to selected points used for calculating the BET surface area of the material. Black-filled and hollow spheres denote the adsorption and desorption branches of the  $N_2$  isotherm, respectively.

**Table S7.** Summary of porosity properties of the V-TABPy, Ga-TBAPy, V-TCPB, and Ga-TCPB.

| Sample   | BET surface area <sup>a</sup><br>( $m^2 g^{-1}$ ) | Langmuir surface area<br>( $m^2 g^{-1}$ ) | BET constant, C | Pore volume <sup>b</sup><br>( $cm^3 g^{-1}$ ) | Pore size <sup>c</sup><br>( $\text{\AA}$ ) |
|----------|---------------------------------------------------|-------------------------------------------|-----------------|-----------------------------------------------|--------------------------------------------|
| V-TBAPy  | 1370                                              | 1482                                      | 10,533.39       | 0.557                                         | 6.40, 8.60                                 |
| Ga-TBAPy | 1484                                              | 1646                                      | 8,943.82        | 0.669                                         | 5.90, 8.60                                 |
| V-TCPB   | 1107                                              | 1224                                      | 5,051.11        | 0.482                                         | 5.38, 6.82                                 |
| Ga-TCPB  | 1144                                              | 1209                                      | 9,405.82        | 0.469                                         | 5.95, 6.80, 7.85                           |

<sup>a</sup>Calculated from the  $N_2$  adsorption isotherm recorded at 77 K in the  $P/P^\circ$ -range given in Figs. S22-S25.

<sup>b</sup>Total pore volume estimated from the adsorption branch of the  $N_2$  isotherm recorded at 77 K at  $P/P^\circ = 0.93$ .

<sup>c</sup>Calculated by DFT from the adsorption branch of the  $N_2$  isotherm recorded at 77 K at  $P/P^\circ < 1 \times 10^{-2}$  using a slit-type pore geometry.

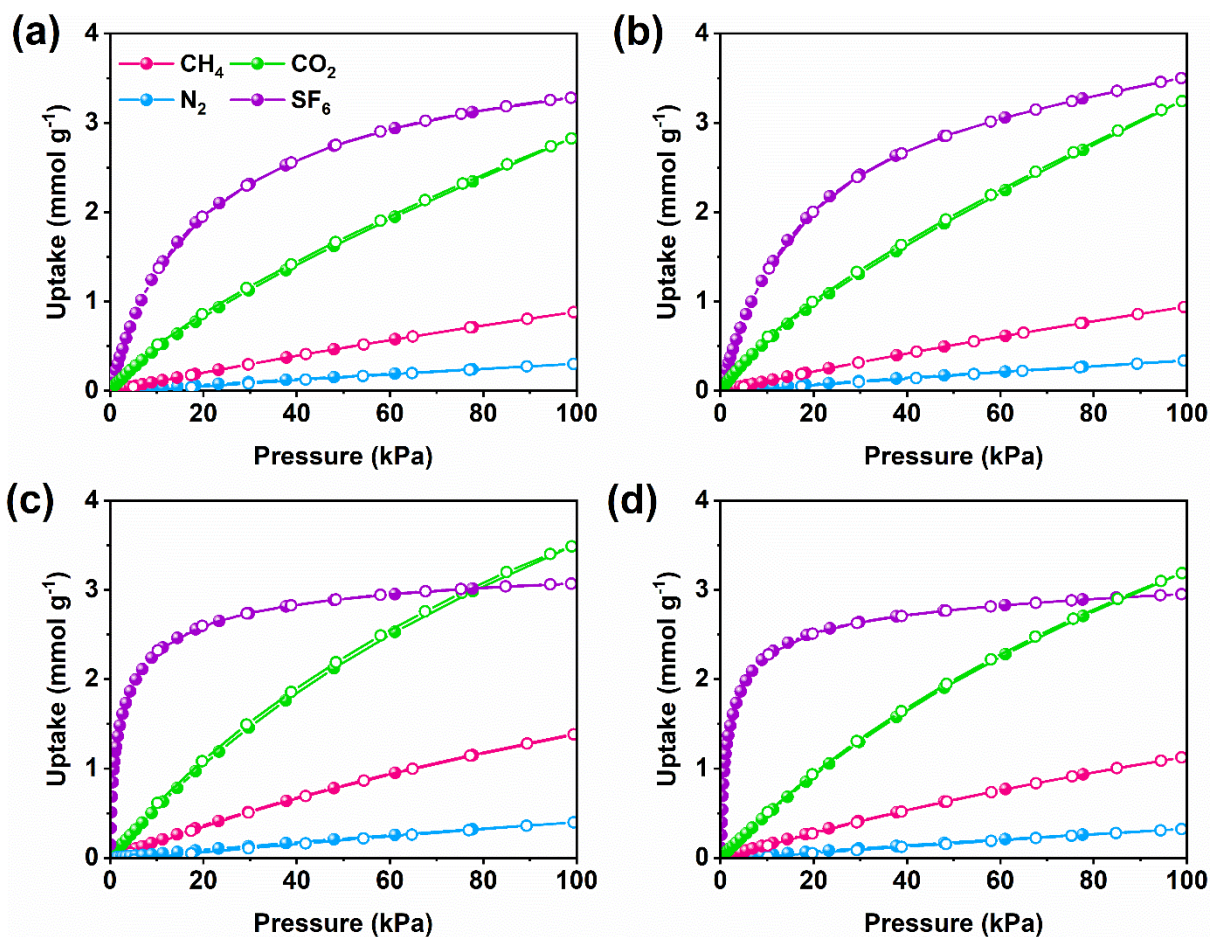

**Fig. S26.** CH<sub>4</sub>, CO<sub>2</sub>, N<sub>2</sub>, and SF<sub>6</sub> sorption isotherms recorded at 293 K of (a) V-TBAPy, (b) Ga-TBAPy, (c) V-TCPB, and (d) Ga-TCPB. Filled and hollow spheres represent the adsorption and desorption isotherms, respectively.

**Table S8.** Uptake capacities of CH<sub>4</sub>, CO<sub>2</sub>, N<sub>2</sub>, and SF<sub>6</sub> at 293 K and 100 kPa of V-TBAPy, Ga-TBAPy, V-TCPB, and Ga-TCPB.

| Samples  | CH <sub>4</sub><br>(mmol g <sup>-1</sup> ) | CO <sub>2</sub><br>(mmol g <sup>-1</sup> ) | N <sub>2</sub><br>(mmol g <sup>-1</sup> ) | SF <sub>6</sub><br>(mmol g <sup>-1</sup> ) |
|----------|--------------------------------------------|--------------------------------------------|-------------------------------------------|--------------------------------------------|
| V-TBAPy  | 0.88                                       | 2.83                                       | 0.30                                      | 3.28<br>1.32 <sup>a</sup>                  |
| Ga-TBAPy | 0.94                                       | 3.24                                       | 0.34                                      | 3.50<br>1.33 <sup>a</sup>                  |
| V-TCPB   | 1.38                                       | 3.49                                       | 0.40                                      | 3.07<br>2.29 <sup>a</sup>                  |
| Ga-TCPB  | 1.13                                       | 3.19                                       | 0.32                                      | 2.95<br>2.25 <sup>a</sup>                  |

<sup>a</sup>Uptake at 10 kPa.

**Table S9.** Summary of SF<sub>6</sub> uptake capacities, selectivities, and enthalpies of adsorption of various MOF sorbents.

| Materials                       | SF <sub>6</sub> uptake<br>at 10 kPa<br>(mmol g <sup>-1</sup> ) | SF <sub>6</sub> uptake<br>at 100 kPa<br>(mmol g <sup>-1</sup> ) | IAST<br>selectivity<br>(10:90) SF <sub>6</sub> /N <sub>2</sub> | -ΔH <sub>ads</sub><br>(kJ mol <sup>-1</sup> ) <sup>a</sup> | Ref.             |
|---------------------------------|----------------------------------------------------------------|-----------------------------------------------------------------|----------------------------------------------------------------|------------------------------------------------------------|------------------|
| Cu-MOF-NH <sub>2</sub>          | 3.39                                                           | 7.88                                                            | 266.2                                                          | 55.20                                                      | 12               |
| Zn(TMBDC)(DABCO) <sub>0.5</sub> | 2.48                                                           | 4.61                                                            | 219.0                                                          | 45.20                                                      | 13               |
| Ni(ina) <sub>2</sub>            | 2.39                                                           | 2.84                                                            | 375.1                                                          | 33.40                                                      | 14               |
| <b>V-TCPB</b>                   | <b>2.29</b>                                                    | <b>3.07</b>                                                     | <b>360.7</b>                                                   | <b>30.48</b>                                               | <b>This work</b> |
| <b>Ga-TCPB</b>                  | <b>2.26</b>                                                    | <b>2.95</b>                                                     | <b>418.5</b>                                                   | <b>30.44</b>                                               | <b>This work</b> |
| Ni(adc)(dabco) <sub>0.5</sub>   | 2.23                                                           | 2.38                                                            | 919.4                                                          | 47.68                                                      | 15               |
| Co-MOF-74                       | 2.09                                                           | 5.34                                                            | 35.1                                                           | 40.00                                                      | 16               |
| Mg-MOF-74                       | 2.04                                                           | 6.42                                                            | 18.9                                                           | 32.00                                                      | 16               |
| Ni(3-mpba) <sub>2</sub>         | 1.79                                                           | 2.83                                                            | 221.0                                                          | 30.20                                                      | 17               |
| Co(3-mpba) <sub>2</sub>         | 1.77                                                           | 3.25                                                            | 161.0                                                          | 26.80                                                      | 17               |
| Ni(pba) <sub>2</sub>            | 1.69                                                           | 3.47                                                            | 156.5                                                          | 26.10                                                      | 17               |
| Zn-MOF-74                       | 1.42                                                           | 3.72                                                            | 46.0                                                           | 25.00                                                      | 16               |
| HKUST-1                         | 1.41                                                           | 6.71                                                            | 159.4                                                          | 27.73                                                      | 18               |
| Zn(DMBDC)(DABCO) <sub>0.5</sub> | 1.40                                                           | 4.77                                                            | 109.3                                                          | 26.50                                                      | 13               |
| <b>Ga-TBAPy</b>                 | <b>1.33</b>                                                    | <b>3.50</b>                                                     | <b>55.4</b>                                                    | <b>27.18</b>                                               | <b>This work</b> |
| <b>V-TBAPy</b>                  | <b>1.33</b>                                                    | <b>3.28</b>                                                     | <b>65.6</b>                                                    | <b>28.08</b>                                               | <b>This work</b> |
| CAU-10-Py                       | 1.13                                                           | 1.76                                                            | 203.6                                                          | 32.60                                                      | 19               |
| SBMOF-1                         | 0.93                                                           | 1.02                                                            | 325.0                                                          | 32.50                                                      | 20               |
| UiO-66                          | 0.82                                                           | 1.67                                                            | 129.9                                                          | 32.38                                                      | 21               |
| UiO-66-Br <sub>2</sub>          | 0.76                                                           | 0.94                                                            | 222.2                                                          | 44.62                                                      | 21               |
| CAU-10-H                        | 0.68                                                           | 1.00                                                            | 122.6                                                          | 24.90                                                      | 19               |
| UiO-67                          | 0.48                                                           | 3.58                                                            | 21.5                                                           | 20.43                                                      | 22               |
| MIL-100(Fe)                     | 0.30                                                           | 2.59                                                            | 15.8                                                           | 24.19                                                      | 23               |

<sup>a</sup>At zero or low coverage

## Section S6.1. Isothermic enthalpies of adsorption

Isothermic enthalpies of SF<sub>6</sub> and CO<sub>2</sub> adsorption were estimated from pure-component isotherms of SF<sub>6</sub> or CO<sub>2</sub> recorded at 283 – 303 K using the Virial equation (Eq. 1)<sup>24</sup>:

$$\ln P = \ln N + \frac{1}{T} \sum_{i=0}^m a_i N^i + \sum_{j=0}^n b_j N^j \quad [1]$$

Where  $P$  (kPa) is the ideal gas constant,  $N$  (mmol g<sup>-1</sup>) quantity of adsorbed gas at temperature  $T$  (K),  $a_i$  and  $b_j$  virial coefficients.

The isothermic enthalpy of adsorption ( $\Delta H_{ads}$ ) was thereafter calculated using Eq. 2:

$$\Delta H_{ads} = R \sum_{i=0}^m a_i N^i \quad [2]$$

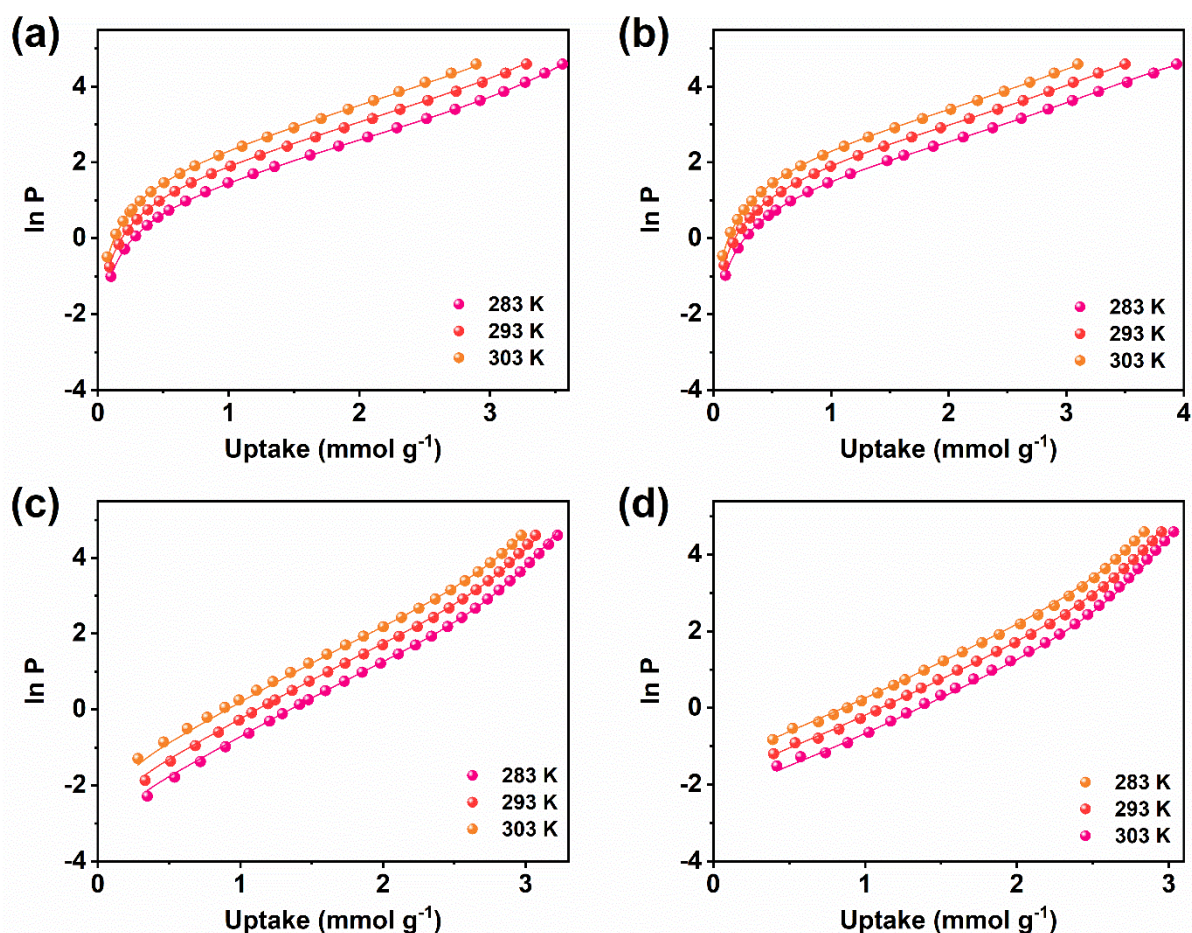

**Fig S27.** Virial fit of SF<sub>6</sub> adsorption isotherms recorded at 283 – 303 K for (a) V-TBAPy, (b) Ga-TBAPy, (c) V-TCPB, and (d) Ga-TCPB.

**Table S10.** Fitting parameters and virial coefficients obtained from SF<sub>6</sub> adsorption isotherms recorded at 283 – 303 K of V-TBAPy.

| Sample | V-TBAPy ± | Ga-TBAPy  | V-TCPB    | Ga-TCPB   |
|--------|-----------|-----------|-----------|-----------|
| $a_0$  | -3280.456 | -3198.130 | -3487.004 | -3428.464 |
| $a_1$  | -392.009  | -300.055  | -909.842  | -3428.464 |
| $a_2$  | 13.265    | 76.659    | 757.361   | 972.760   |
| $a_3$  | 33.483    | -44.172   | -305.211  | -381.211  |
| $a_4$  | -14.937   | 15.391    | 47.576    | 61.515    |
| $a_5$  | 2.208     | -1.775    | -         | -         |
| $b_0$  | 12.883    | 12.598    | 11.562    | 12.050    |
| $b_1$  | 1.418     | 1.084     | 1.497     | 1.266     |
| RMSE   | 0.01998   | 0.01455   | 0.05194   | 0.04840   |

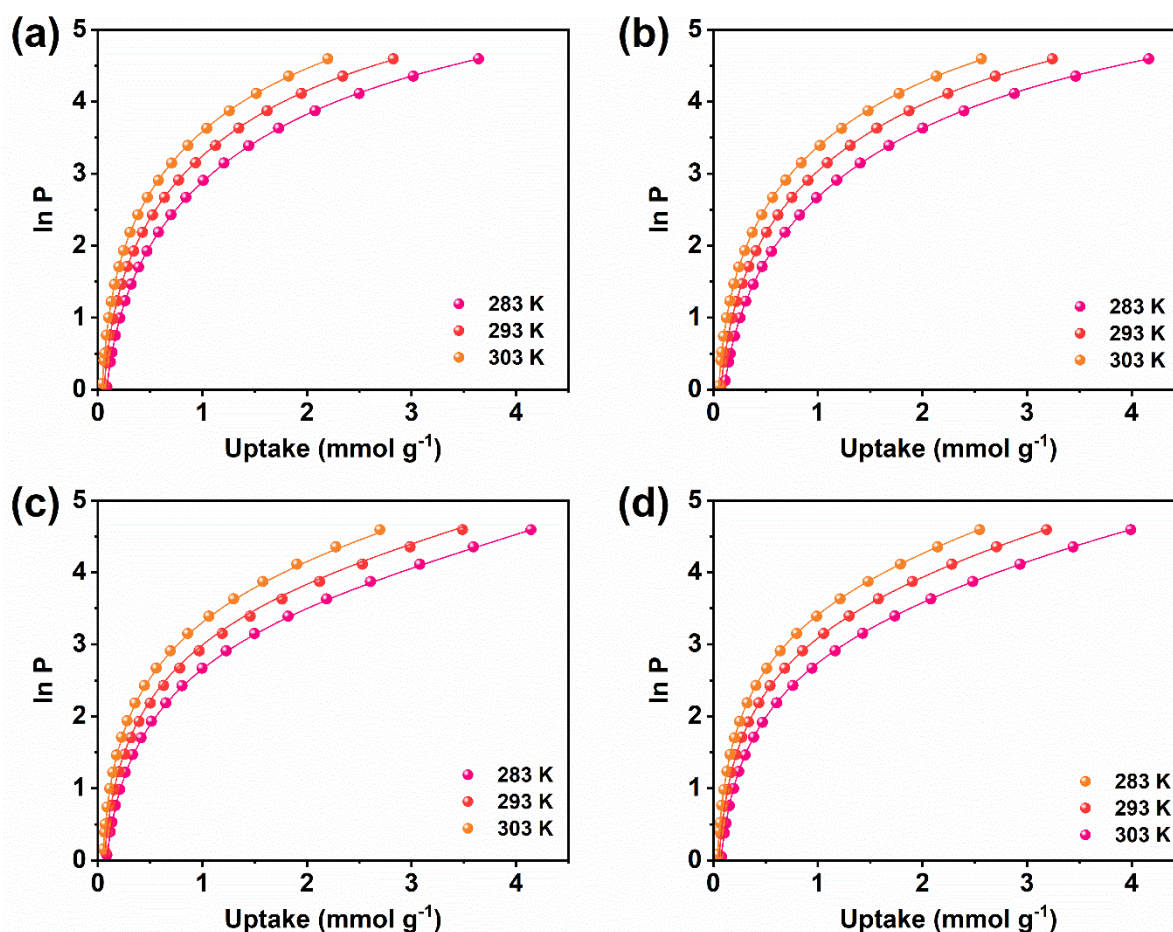

**Fig S28.** Virial fit of CO<sub>2</sub> adsorption isotherms recorded at 283 – 303 K for (a) V-TBAPy, (b) Ga-TBAPy, (c) V-TCPB, and (d) Ga-TCPB.

**Table S11.** Fitting parameters and virial coefficients obtained from CO<sub>2</sub> adsorption isotherms recorded at 283 – 303 K of V-TBAPy.

| Sample | V-TBAPy   | Ga-TBAPy  | V-TCPB    | Ga-TCPB   |
|--------|-----------|-----------|-----------|-----------|
| $a_0$  | -3346.979 | -3304.601 | -2767.651 | -2800.397 |
| $a_1$  | 372.217   | 331.174   | -2.378    | -69.746   |
| $a_2$  | -37.975   | -32.823   | -7.497    | 5.416     |
| $a_3$  | 3.381     | 2.650     | 1.342     | -0.515    |
| $b_0$  | 14.264    | 13.914    | 12.264    | 12.520    |
| $b_1$  | -0.748    | -0.626    | 0.202     | 0.346     |
| RMSE   | 0.00892   | 0.00667   | 0.03000   | 0.00674   |

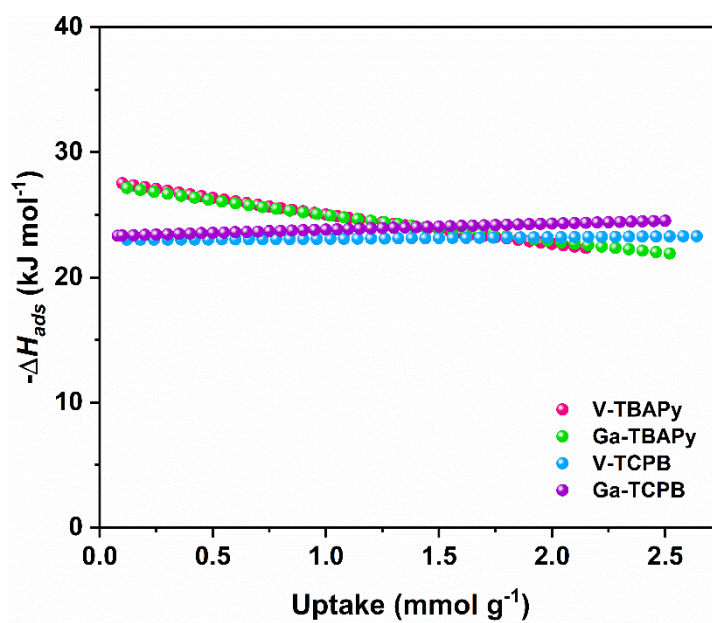

**Fig. S29.** Isosteric enthalpies of CO<sub>2</sub> adsorption ( $-\Delta H_{ads}$ ) for V-, Ga-TBAPy and V-, Ga-TCPB.

## Section S6.2. Gas selectivity

### Section S6.2.1. Ideal (Henry's Law) selectivity

Ideal selectivities were calculated from pure-component CH<sub>4</sub>, CO<sub>2</sub>, N<sub>2</sub>, and SF<sub>6</sub> isotherms at 293 K in the low-pressure region using the Henry's law constants ( $s = K_{H, \text{gas}1} / K_{H, \text{gas}2}$ ).

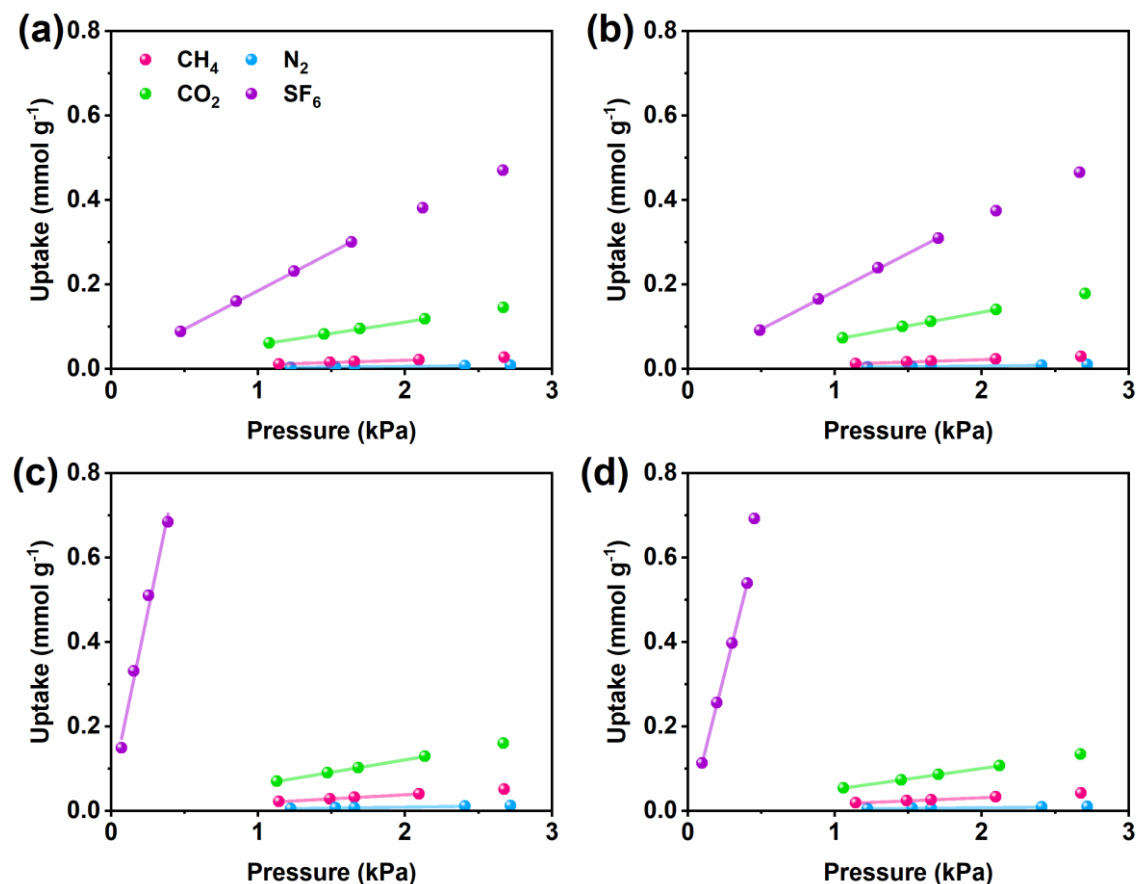

**Fig S30.** Linear fits of the CH<sub>4</sub>, CO<sub>2</sub>, N<sub>2</sub>, and SF<sub>6</sub> adsorption isotherms recorded at 293 K in the low-pressure region of (a) V-TBAPy, (b) Ga-TBAPy, (c) V-TCPB, and (d) Ga-TCPB.

**Table S12.** Linear fitting parameters and calculated ideal SF<sub>6</sub>/N<sub>2</sub>, CO<sub>2</sub>/N<sub>2</sub> selectivities from low-pressure data of CH<sub>4</sub>, CO<sub>2</sub>, N<sub>2</sub>, and SF<sub>6</sub> adsorption isotherms recorded at 293 K of V-TBAPy.

| Gas             | Intercept<br>(mmol g <sup>-1</sup> ) | Slope<br>(mmol g <sup>-1</sup> kPa <sup>-1</sup> ) | R <sup>2</sup> | Ideal<br>SF <sub>6</sub> /N <sub>2</sub><br>selectivity | Ideal<br>CO <sub>2</sub> /N <sub>2</sub><br>selectivity |
|-----------------|--------------------------------------|----------------------------------------------------|----------------|---------------------------------------------------------|---------------------------------------------------------|
| SF <sub>6</sub> | 0.00442                              | 0.18169                                            | 0.99977        |                                                         |                                                         |
| CO <sub>2</sub> | 0.00453                              | 0.05352                                            | 0.99982        | 53.75                                                   | 15.83                                                   |
| CH <sub>4</sub> | 0.00005                              | 0.01053                                            | 1              |                                                         |                                                         |
| N <sub>2</sub>  | 0.00001                              | 0.00338                                            | 1              |                                                         |                                                         |

**Table S13.** Linear fitting parameters and calculated ideal SF<sub>6</sub>/N<sub>2</sub>, CO<sub>2</sub>/N<sub>2</sub> selectivities from low-pressure data of CH<sub>4</sub>, CO<sub>2</sub>, N<sub>2</sub>, and SF<sub>6</sub> adsorption isotherms recorded at 293 K of Ga-TBAPy.

| <b>Gas</b>      | <b>Intercept<br/>(mmol g<sup>-1</sup>)</b> | <b>Slope<br/>(mmol g<sup>-1</sup> kPa<sup>-1</sup>)</b> | <b>R<sup>2</sup></b> | <b>Ideal<br/>SF<sub>6</sub>/N<sub>2</sub><br/>selectivity</b> | <b>Ideal<br/>CO<sub>2</sub>/N<sub>2</sub><br/>selectivity</b> |
|-----------------|--------------------------------------------|---------------------------------------------------------|----------------------|---------------------------------------------------------------|---------------------------------------------------------------|
| SF <sub>6</sub> | 0.00534                                    | 0.17957                                                 | 0.99954              |                                                               |                                                               |
| CO <sub>2</sub> | 0.00627                                    | 0.06433                                                 | 0.99948              | 47.51                                                         | 17.02                                                         |
| CH <sub>4</sub> | 0.00006                                    | 0.01126                                                 | 1                    |                                                               |                                                               |
| N <sub>2</sub>  | 0.00002                                    | 0.00378                                                 | 1                    |                                                               |                                                               |

**Table S14.** Linear fitting parameters and calculated ideal SF<sub>6</sub>/N<sub>2</sub>, CO<sub>2</sub>/N<sub>2</sub> selectivities from low-pressure data of CH<sub>4</sub>, CO<sub>2</sub>, N<sub>2</sub>, and SF<sub>6</sub> adsorption isotherms recorded at 293 K of V-TCPB.

| <b>Gas</b>      | <b>Intercept<br/>(mmol g<sup>-1</sup>)</b> | <b>Slope<br/>(mmol g<sup>-1</sup> kPa<sup>-1</sup>)</b> | <b>R<sup>2</sup></b> | <b>Ideal<br/>SF<sub>6</sub>/N<sub>2</sub><br/>selectivity</b> | <b>Ideal<br/>CO<sub>2</sub>/N<sub>2</sub><br/>selectivity</b> |
|-----------------|--------------------------------------------|---------------------------------------------------------|----------------------|---------------------------------------------------------------|---------------------------------------------------------------|
| SF <sub>6</sub> | 0.05441                                    | 1.68071                                                 | 0.98883              |                                                               |                                                               |
| CO <sub>2</sub> | 0.00384                                    | 0.05873                                                 | 0.99998              | 365.37                                                        | 12.77                                                         |
| CH <sub>4</sub> | 0.00019                                    | 0.01912                                                 | 1                    |                                                               |                                                               |
| N <sub>2</sub>  | 0.00002                                    | 0.00460                                                 | 1                    |                                                               |                                                               |

**Table S15.** Linear fitting parameters and calculated ideal SF<sub>6</sub>/N<sub>2</sub>, CO<sub>2</sub>/N<sub>2</sub> selectivities from low-pressure data of CH<sub>4</sub>, CO<sub>2</sub>, N<sub>2</sub>, and SF<sub>6</sub> adsorption isotherms recorded at 293 K of Ga-TCPB.

| <b>Gas</b>      | <b>Intercept<br/>(mmol g<sup>-1</sup>)</b> | <b>Slope<br/>(mmol g<sup>-1</sup> kPa<sup>-1</sup>)</b> | <b>R<sup>2</sup></b> | <b>Ideal<br/>SF<sub>6</sub>/N<sub>2</sub><br/>selectivity</b> | <b>Ideal<br/>CO<sub>2</sub>/N<sub>2</sub><br/>selectivity</b> |
|-----------------|--------------------------------------------|---------------------------------------------------------|----------------------|---------------------------------------------------------------|---------------------------------------------------------------|
| SF <sub>6</sub> | -0.01938                                   | 1.38600                                                 | 0.99982              |                                                               |                                                               |
| CO <sub>2</sub> | 0.00165                                    | 0.04963                                                 | 0.99999              | 437.22                                                        | 15.66                                                         |
| CH <sub>4</sub> | 0.00195                                    | 0.01475                                                 | 0.99857              |                                                               |                                                               |
| N <sub>2</sub>  | 0.00146                                    | 0.00317                                                 | 0.98115              |                                                               |                                                               |



## Section S6.2.2. Ideal adsorption solution theory (IAST) selectivity

The pure-component SF<sub>6</sub> and N<sub>2</sub> isotherms recorded at 293 K were modeled using the Langmuir (Eq. 3) or dual-site Langmuir models (Eq. 4):

$$N_{eq} = \frac{N_{1,sat}b_1P}{1 + b_1P} \quad [3]$$

$$N_{eq} = \frac{N_{1,sat}b_1P}{1 + b_1P} + \frac{N_{2,sat}b_2P}{1 + b_2P} \quad [4]$$

Where  $N_{eq}$  (mmol g<sup>-1</sup>) is the quantity of gas adsorbed under equilibrium at pressure  $P$  (kPa),  $N_{1,sat}$  and  $N_{2,sat}$  (mmol g<sup>-1</sup>) are the maximum adsorption capacities of sites 1 and 2, and  $b_1$  and  $b_2$  (kPa<sup>-1</sup>) are the Langmuir equilibrium constants.

IAST calculations were furthermore carried out for a theoretical gas mixture containing SF<sub>6</sub>/N<sub>2</sub> (10:90) using the fitted isotherms in accordance with the IAST equations presented by Myers and Prausnitz<sup>25</sup>.

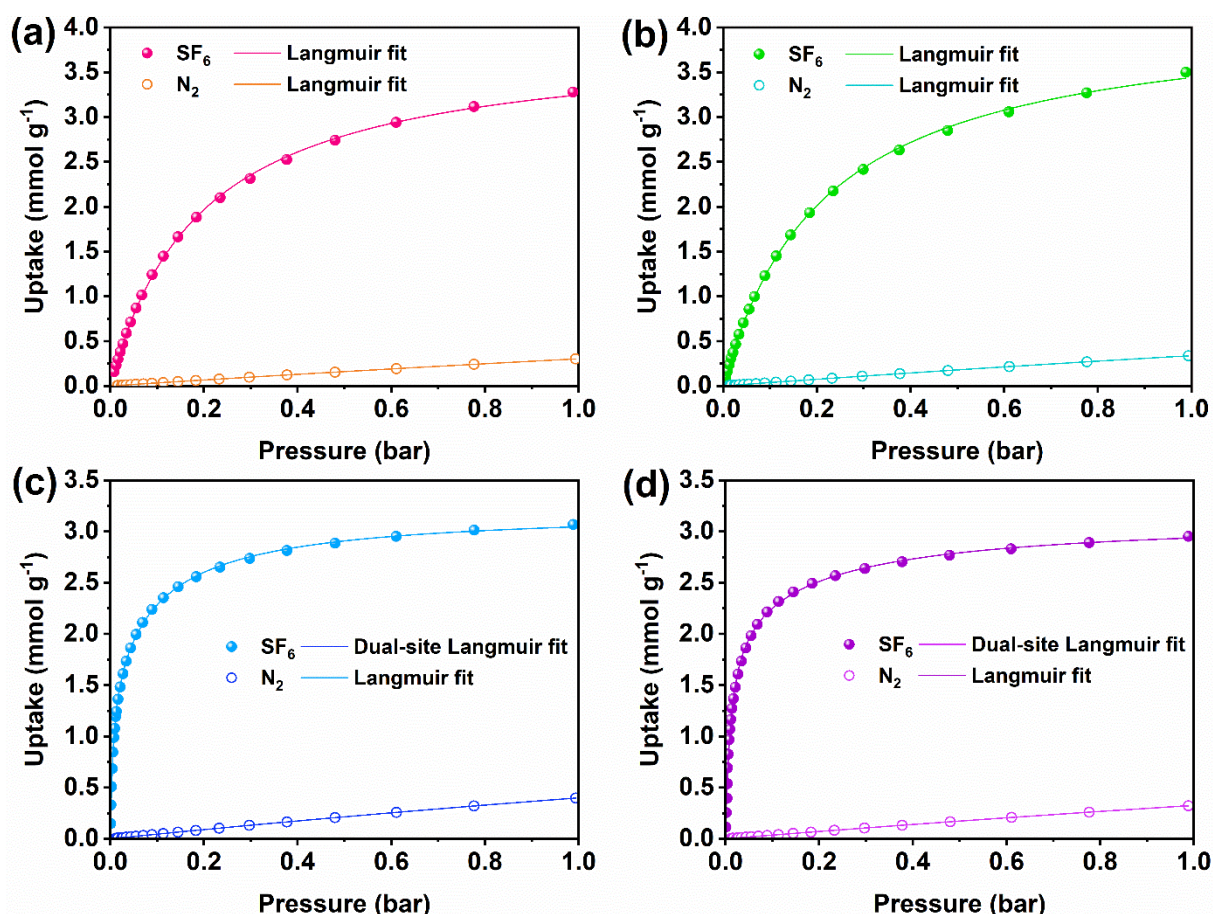

**Fig. S31.** Langmuir and dual-site Langmuir fits of CO<sub>2</sub> and N<sub>2</sub> adsorption isotherms recorded at 293 K for (a) V-TBAPy, (b) Ga-TBAPy, (c) V-TCPB, and (d) Ga-TCPB.

**Table S16.** Langmuir and dual-site Langmuir fitting parameters for CO<sub>2</sub> adsorption isotherms recorded at 293 K of V-TBAPy, Ga-TBAPy, V-TCPB, and Ga-TCPB.

|                                     | <b>V-TBAPy</b> | <b>Ga-TBAPy</b> | <b>V-TCPB</b> | <b>Ga-TCPB</b> |
|-------------------------------------|----------------|-----------------|---------------|----------------|
| $N_{1,sat}$ (mmol g <sup>-1</sup> ) | 3.87684        | 4.18311         | 1.58472       | 2.16207        |
| $b_1$ (bar <sup>-1</sup> )          | 5.15984        | 4.64016         | 162.92417     | 91.00422       |
| $N_{2,sat}$ (mmol g <sup>-1</sup> ) | -              | -               | 1.62618       | 0.97692        |
| $b_2$ (bar <sup>-1</sup> )          | -              | -               | 9.49274       | 4.51466        |
| <i>RMSE</i>                         | 0.01834        | 0.01953         | 0.01220       | 0.03609        |

**Table S17.** Langmuir fitting parameters for N<sub>2</sub> adsorption isotherms recorded at 293 K of V-TBAPy, Ga-TBAPy, V-TCPB, and Ga-TCPB.

|                                     | <b>V-TBAPy</b> | <b>Ga-TBAPy</b> | <b>V-TCPB</b> | <b>Ga-TCPB</b> |
|-------------------------------------|----------------|-----------------|---------------|----------------|
| $N_{1,sat}$ (mmol g <sup>-1</sup> ) | 2.86370        | 3.12058         | 2.95920       | 2.92551        |
| $b_1$ (bar <sup>-1</sup> )          | 0.11813        | 0.12150         | 0.15631       | 0.12558        |
| <i>RMSE</i>                         | 0.00012        | 0.00010         | 0.00002       | 0.00001        |

## Section S7. SF<sub>6</sub> and CO<sub>2</sub> temperature-swing adsorption cycling

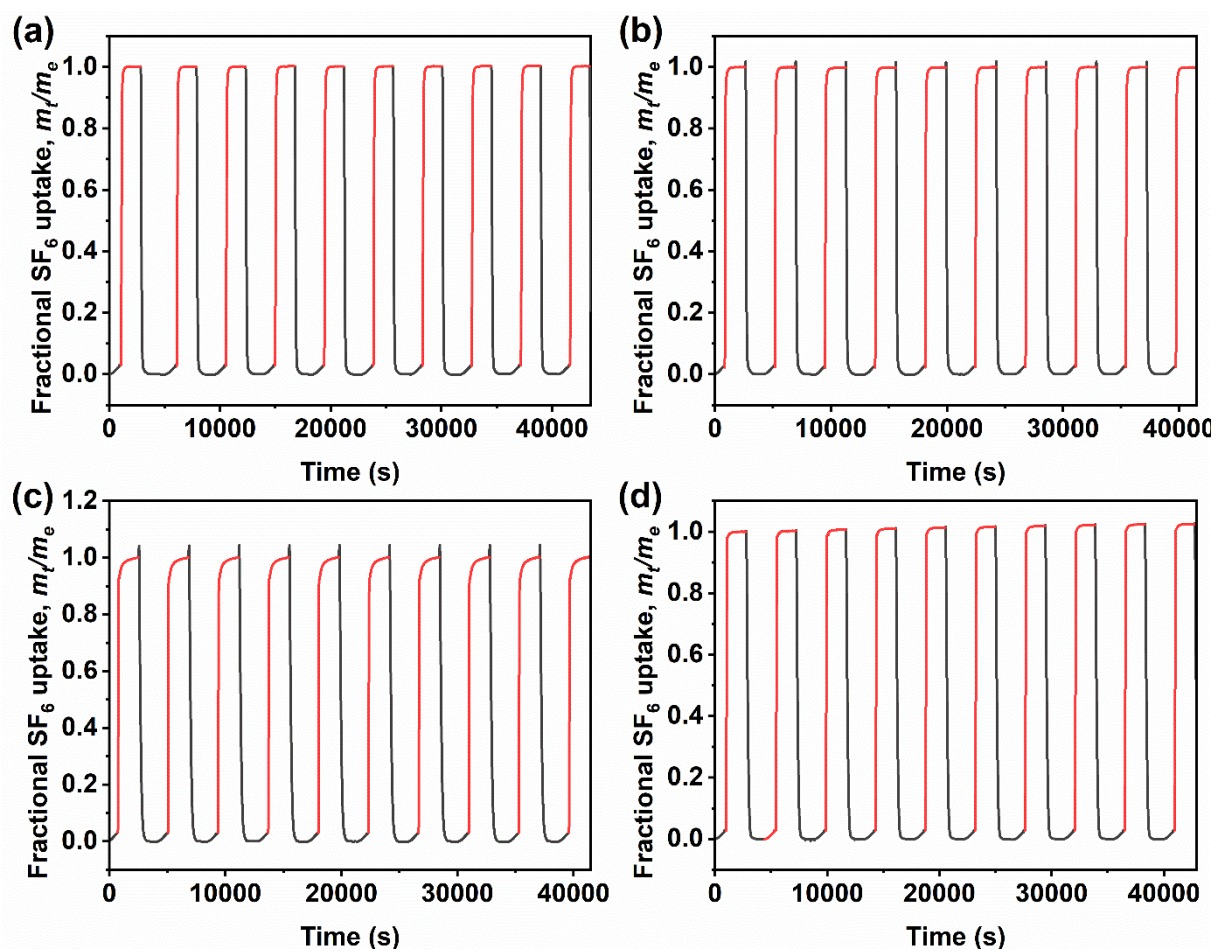

**Fig. S32.** Gravimetric temperature-swing adsorption cycling of SF<sub>6</sub> on (a) V-TBAPy, (b) Ga-TBAPy, and (c) Ga-TBAPy. The adsorption and desorption part of the cycles are highlighted in red and black, respectively.

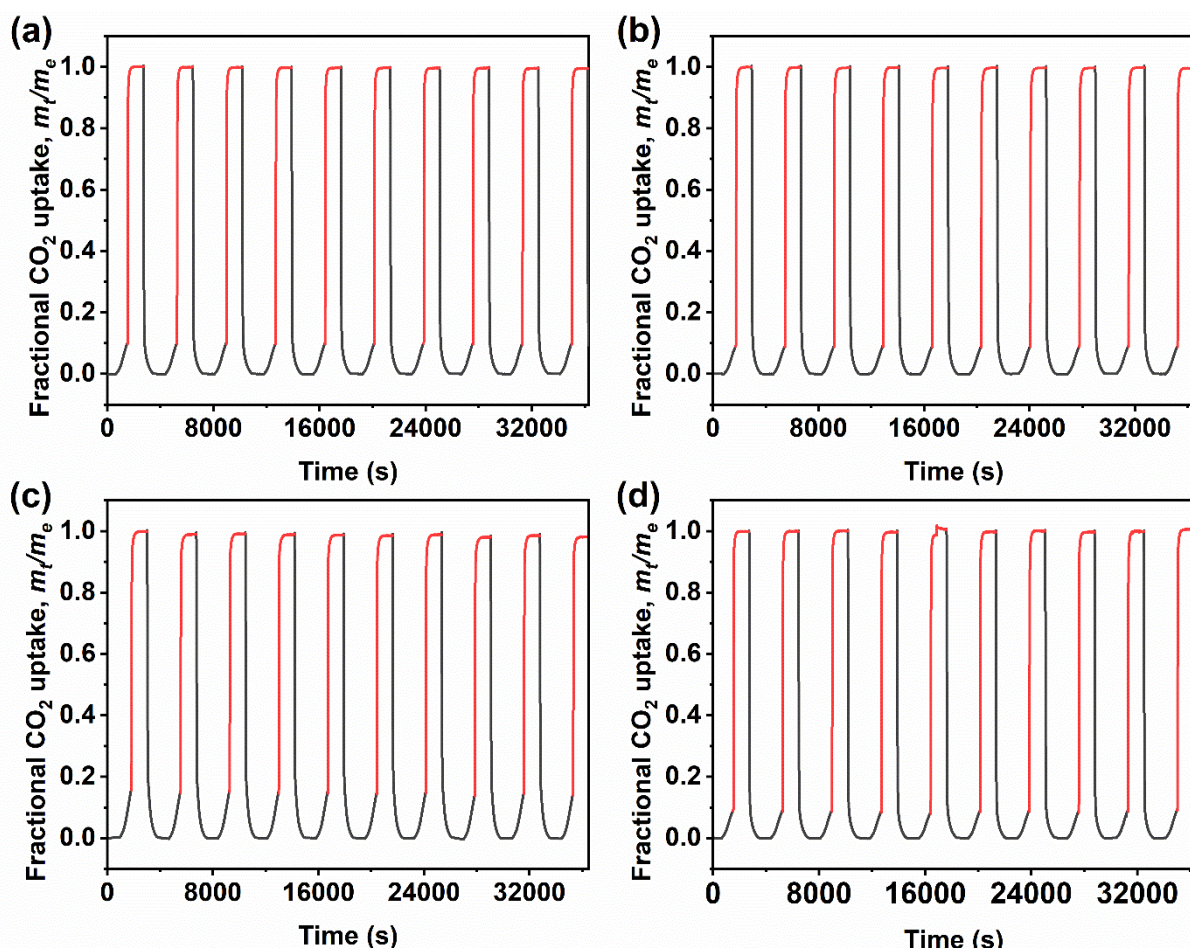

**Fig. S33.** Gravimetric temperature-swing adsorption cycling of CO<sub>2</sub> on (a) V-TABPy, (b) Ga-TBAPy, (c) V-TCPB, and (d) Ga-TCPB. The adsorption and desorption part of the cycles are highlighted in red and black, respectively.

## References

1. P. Oleynikov, 2011.
2. W. Kabsch, *Acta Crystallogr. D Biol. Crystallogr.*, 2010, **66**, 125-132.
3. O. V. Dolomanov, L. J. Bourhis, R. J. Gildea, J. A. K. Howard and H. Puschmann, *J. Appl. Crystallogr.*, 2009, **42**, 339-341.
4. G. M. Sheldrick, *Acta Crystallogr. A Found. Adv.*, 2015, **71**, 3-8.
5. G. M. Sheldrick, *Acta Crystallogr. C Struct. Chem.*, 2015, **71**, 3-8.
6. G. L. Marra, A. N. Fitch, A. Zecchina, G. Ricchiardi, M. Salvalaggio, S. Bordiga and C. Lamberti, *J. Phys. Chem. B*, 1997, **101**, 10653–10660.
7. H. M. Rietveld, *Aust. J. Phys.*, 1988, **41**, 113-116.
8. V. Petříček, M. Dušek and L. Palatinus, *Z. Kristallogr. Cryst. Mater.*, 2014, **229**, 345-352.
9. K. Momma and F. Izumi, *J. Appl. Crystallogr.*, 2011, **44**, 1272-1276.
10. Y.-Y. Liu, S. Couck, M. Vandichel, M. Grzywa, K. Leus, S. Biswas, D. Volkmer, J. Gascon, F. Kapteijn, J. F. M. Denayer, M. Waroquier, V. Van Speybroeck and P. Van Der Voort, *Inorg. Chem.*, 2013, **52**, 113-120.
11. G. Silversmit, D. Depla, H. Poelman, G. B. Marin and R. De Gryse, *J. Electron Spectrosc. Relat. Phenom.*, 2004, **135**, 167-175.

12. J. Ren, M. Chang, W. Zeng, Y. Xia, D. Liu, G. Maurin and Q. Yang, *Chem. Mater.*, 2021, **33**, 5108-5114.
13. L. Yan, H.-T. Zheng, L. Song, Z.-W. Wei, J.-J. Jiang and C.-Y. Su, *Chem. Eng. J.*, 2023, **472**.
14. S.-M. Wang, X.-T. Mu, H.-R. Liu, S.-T. Zheng and Q.-Y. Yang, *Angew. Chem. Int. Ed.*, 2022, **61**, e202207066.
15. M. Chang, T. Yan, Y. Wei, J.-X. Wang, D. Liu and J.-F. Chen, *Chem. Mater.*, 2022, **34**, 9134-9143.
16. M.-B. Kim, S.-J. Lee, C. Y. Lee and Y.-S. Bae, *Microporous Mesoporous Mater.*, 2014, **190**, 356-361.
17. S.-T. Zheng, R.-Y. Jiang, Y. Jiang, S. Ni, G.-W. Guan, S.-Q. Shao, Y.-C. Wang, S.-M. Wang and Q.-Y. Yang, *Sep. Purif. Technol.*, 2023, **318**.
18. P. Liu, T. Zhao, K. Cai, P. Chen, F. Liu and D.-J. Tao, *Chem. Eng. J.*, 2022, **437**.
19. Y. Hu, L. Wang, R. Nan, N. Xu, Y. Jiang, D. Wang, T. Yan, D. Liu, Y. Zhang and B. Chen, *Chem. Eng. J.*, 2023, **471**.
20. T. Wang, M. Chang, T. Yan, Y. Ying, Q. Yang and D. Liu, *Ind. Eng. Chem. Res.*, 2021, **60**, 5976-5983.
21. M.-B. Kim, K.-M. Kim, T.-H. Kim, T.-U. Yoon, E.-J. Kim, J.-H. Kim and Y.-S. Bae, *Chem. Eng. J.*, 2018, **339**, 223-229.
22. M.-B. Kim, T.-H. Kim, T.-U. Yoon, J. H. Kang, J.-H. Kim and Y.-S. Bae, *JIEC*, 2020, **84**, 179-184.
23. M.-B. Kim, T.-U. Yoon, D.-Y. Hong, S.-Y. Kim, S.-J. Lee, S.-I. Kim, S.-K. Lee, J.-S. Chang and Y.-S. Bae, *Chem. Eng. J.*, 2015, **276**, 315-321.
24. L. Czepirski and J. Jagiełło, *Chem. Eng. Sci.*, 1989, **44**, 797-801.
25. A. L. Myers and J. M. Prausnitz, *AIChE J.*, 1965, **11**, 121-127.
